# Supplementary material for: Single-cell peripheral immunoprofiling of Alzheimer’s and Parkinson’s diseases
Source: PubMed Central journal article supplement — Sci Adv. 2020 Nov 25;6(48):eabd5575. doi: 10.1126/sciadv.abd5575 (PMC7688332; doi:10.1126/sciadv.abd5575), 2020-11-25
Supplement: supp_6_48_eabd5575__1.pdf [file supp_6_48_eabd5575__1.pdf]

advances.sciencemag.org/cgi/content/full/6/48/eabd5575/DC1

## Supplementary Materials for

### Single-cell peripheral immunoprofiling of Alzheimer's and Parkinson's diseases

Thanaphong Phongpreecha, Rosemary Fernandez, Dunja Mrdjen, Anthony E. Culos, Chandresh Gajera, Adam M. Wawro, Natalie Stanley, Brice Gaudillière, Kathleen L. Poston, Nima Aghaeepour, Thomas J. Montine\*

\*Corresponding author. Email: [tmontine@stanford.edu](mailto:tmontine@stanford.edu)

Published 25 November 2020, *Sci. Adv.* **6**, eabd5575 (2020)  
DOI: 10.1126/sciadv.abd5575

#### **This PDF file includes:**

Supplementary Methods  
Figs. S1 to S11  
Tables S1 to S7  
References

# Supplementary Materials

## Supplementary Methods

### 1. Clinical diagnosis

A consensus panel consisting of one board-certified movement disorders neurologist or behavioral neurologist, one board-certified neuropsychologist, and other study personnel adjudicated the diagnosis for each participant. PD diagnosis was based on UK PD Society Brain Bank clinical diagnostic criteria (42), as previously reported (43). AD included patients with dementia likely due to AD pathology based on the NIH Alzheimer's Disease Diagnostic Guidelines (44). Healthy controls were determined to have no neurodegenerative disease or concerning cognitive decline by history, a normal neurological exam, and cognitive test scores within 1.5 standard deviations from normative values.

### 2. Data preprocessing

The FCS files acquired on the CyTOF (HELIOS, software version 6.5.358 by Fluidigm, S. San Francisco) were bead normalized using Fluidigm software. The normalized files were then debarcoded using Fluidigm software and the unassigned events were removed. The debarcoded FCS files were gated on Flow-jo Version 10.4.1 to remove beads and doublets and then gated to DNA-high events. The data were then arcsinh transformed and percentile normalized. The percentile normalized FCS files were then gated to characterize a broad range of cell types and signaling molecules (Fig. S9). The gating strategy employed in Fig. S9 was chosen as previously described by the Human Immune Monitoring Center (HIMC), Stanford University (46, 57). The DNA-high events of each sample were gated for basophils and non-basophils. Non-basophils were gated downstream for monocytes, lymphocytes, CD3<sup>+</sup>, CD4<sup>+</sup>, CD8<sup>+</sup>, B cells, NK cells, and

DCs. Each of these cell types was further divided into subpopulations. CD4<sup>+</sup> (effector, naive, central memory and effector memory), CD8<sup>+</sup> (effector, naive, central memory, and effector memory), and B cells (switched memory, IgD<sup>+</sup> memory B, naive, and IgD<sup>-</sup>CD27<sup>-</sup>) were gated using quadrants (Fig. S9). The median expression values of the functional proteins in the gated populations were used for any further analyses.

Six samples that had less than 45% of total cells in DNA-high population for any kind of stimulation condition were excluded from the study. Missing values after gating (~0.1% of the signals in the discovery cohorts) were due to insufficient cell counts and were addressed by mean imputation. A batch correction method, ComBat (58), was applied to reduce the staining batch effect. Batch effect was eliminated as measured by principal variance component analysis (59).

To confirm the subpopulation identity achieved using the gating strategy in Fig. S9, we also employed alternate gating parameters and applied them to 12 randomly selected (sex-matched, 6 HC and 6 AD) samples. The results are shown in Fig. S10. The alternate gating strategy had three steps. First, gates were adjusted to eliminate adjacent borders and ensure no overlap, because subpopulations may change from donor to donor and with stimulation (57, 60). This included non-basophils, monocytes, lymphocytes, CD4<sup>+</sup>, CD8<sup>+</sup>, Tregs, B cells, non-BT, IgA<sup>+</sup> B cells, NK cells, DCs, pDCs, and mDCs. Second, the CD56<sup>+</sup> CD3<sup>+</sup> gate of NKT cells was revised to match the CD56<sup>+</sup> CD3<sup>-</sup> population. Third, all quadrants were removed and specific gates applied to the following subpopulations: CD4<sup>+</sup> (effector, naive, central memory and effector memory), CD8<sup>+</sup> (effector, naive, central memory and effector memory), and B cells (switched memory, IgD<sup>+</sup> memory B, naive, IgD<sup>-</sup>CD27<sup>-</sup> B cells). Comparing the resulting 4,200 median

expression values of the original and alternate gating strategies showed less than 10% difference (excluding outliers) between the two gating strategies across all samples and cell types (Fig. S11, A-B). The % difference was defined as  $2 \cdot \frac{|a-b|}{|a+b|} \times 100\%$ , where a and b represent the values from the original gating strategy and the new values from the alternate gating strategy. Importantly, when these new median expression values were used as inputs to the iEN model (trained on data from the original gating strategy and used to generate the results shown in the main Figures) without any retraining or other changes, the model predicted clear separation between HC and AD (Fig. S11C). Thus, the response observed is consistent across gating strategies.

### **3. Model reduction**

A one-hundred iteration bootstrapping procedure with replacement, each with a subset of patients equal to the size of the full dataset, was employed to identify the number of most significant components of the iEN model. A piecewise regression analysis (61) was then performed on the median  $P$  value of the model from all iterations as a function of the number of features to identify the number of most significant components.

### **4. Correlation network construction**

The layout of the correlation network was obtained by applying a dimension reduction algorithm, t-SNE, on the Spearman correlation matrix of all available immune features. The edge of the graph represents those with Spearman's  $P$  value  $< 0.05$  after Bonferroni adjustment. For visualization of the group of highly correlated immune features, the communities were identified by using uniform manifold approximation and projection (UMAP) to reduce the dimension to



10% of the original immune features, followed by unsupervised clustering using *K*-means algorithm. The optimized number of clusters (24 clusters) was determined based on optimized C-index and Baker-Hubert gamma index.

## **5. Evaluating pPLC $\gamma$ 2 signal as a stand-alone biomarker**

As shown in Figure 4, panels I through K, we tested whether any one of the 280 pPLC $\gamma$ 2 immune features from different cell types and stimulating conditions was sufficient as a stand-alone biomarker without any machine learning. A 1000-iteration leave-group-out cross-validation strategy was used on the discovery cohort. In each iteration and for each feature, the selected pPLC $\gamma$ 2 feature values (or the iEN predicted values from the discovery cohort) were split into 9:1 training/testing set. The threshold that resulted in the highest AUC (top left part of the ROC curve) was established using the training set. The values in the testing set were binarized to 0 and 1 using the threshold and F1-score. A harmonic mean of precision and recall ( $2 \cdot \frac{precision \times recall}{precision + recall}$ ), was calculated by comparing to the ground truth. After 1000 iterations, the thresholds from all iterations were averaged to yield the final threshold used for evaluating that feature against the validation cohort.

## Supplementary Figures

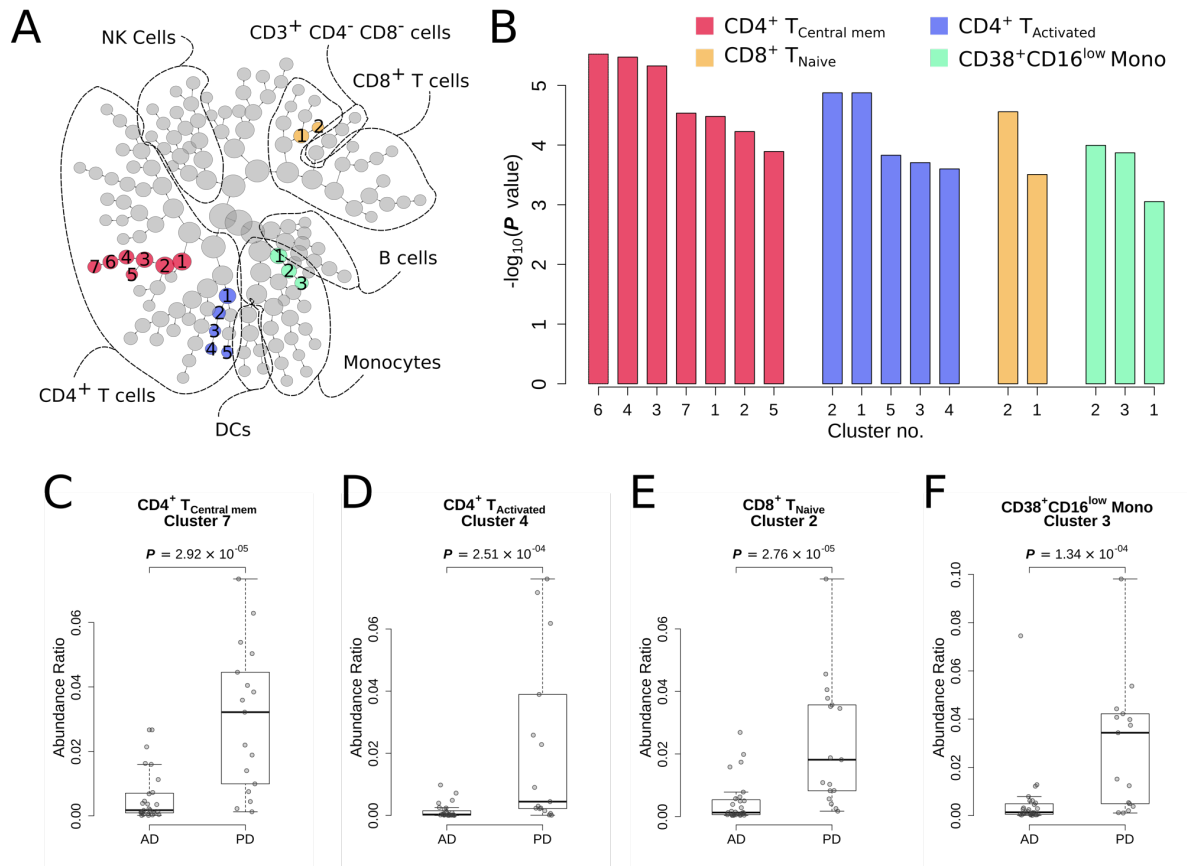

**Fig. S1. Alzheimer’s disease (AD) and Parkinson’s disease (PD) patients exhibited different cell frequencies in several cell subsets. (A),** CITRUS-derived dendrogram of unstimulated PBMC data from AD and PD. PBMC subsets are represented as clusters and color coded for level of marker expression (see Methods). Red-highlighted nodes are CD4<sup>+</sup> T<sub>Central Mem</sub>, blue-highlighted nodes are CD4<sup>+</sup> T<sub>Activated</sub>, orange-highlighted clusters are CD8<sup>+</sup> T<sub>Naive</sub>, and the green clusters are CD38<sup>+</sup>CD16<sup>low</sup> monocytes that were significantly different ( $q$  value < 0.05) between the two diagnostic groups. **(B),** Significance levels of the highlighted nodes. **(C–F),** Box plots presenting example values from the last node in each of the four highlighted lineages.  $P$  values for the stratified subsets were determined using Wilcoxon rank-sum test.

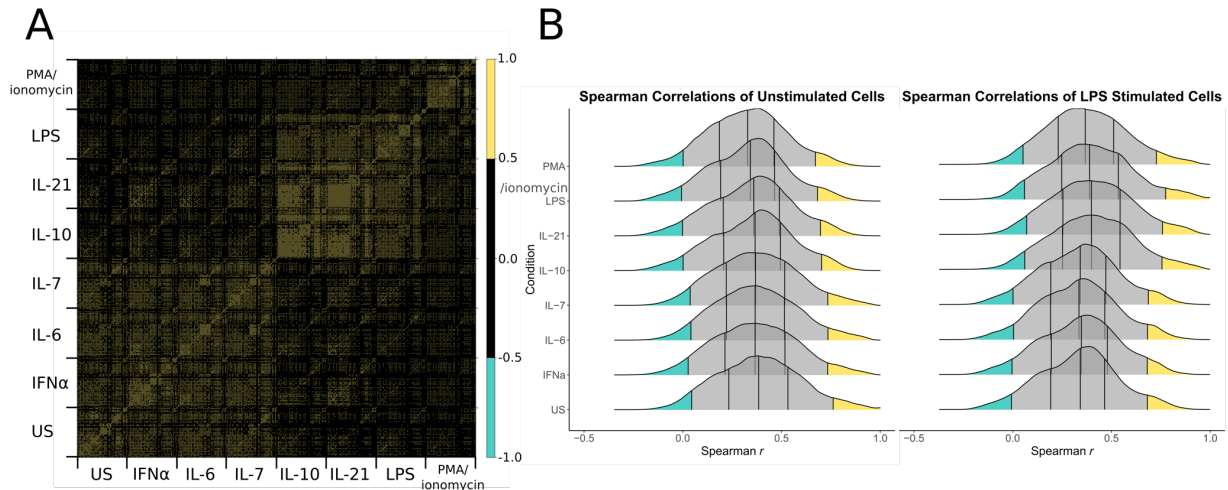

**Fig. S2. Heatmap and distribution plots of Spearman  $r$  coefficients showing higher correlations among stimulation subsets.** (A), Heatmap of the pair-wise correlations among the 4,200 immune features with some tending towards higher correlation coefficients (Spearman  $r > 0.5$ ). The first are among cells from unstimulated (US), IFN- $\alpha$ , IL-6, and IL-7 stimulated conditions; the second are among IL-10, IL-21, LPS, and (to a lesser extent) PMA/ionomycin stimulated cells. (B), Examples of distribution plots showing higher quantiles of Spearman  $r$  between US condition with IFN- $\alpha$ , IL-6, and IL-7 (left), and a similar one for LPS with IL-10, IL-21, and PMA/ionomycin (right).

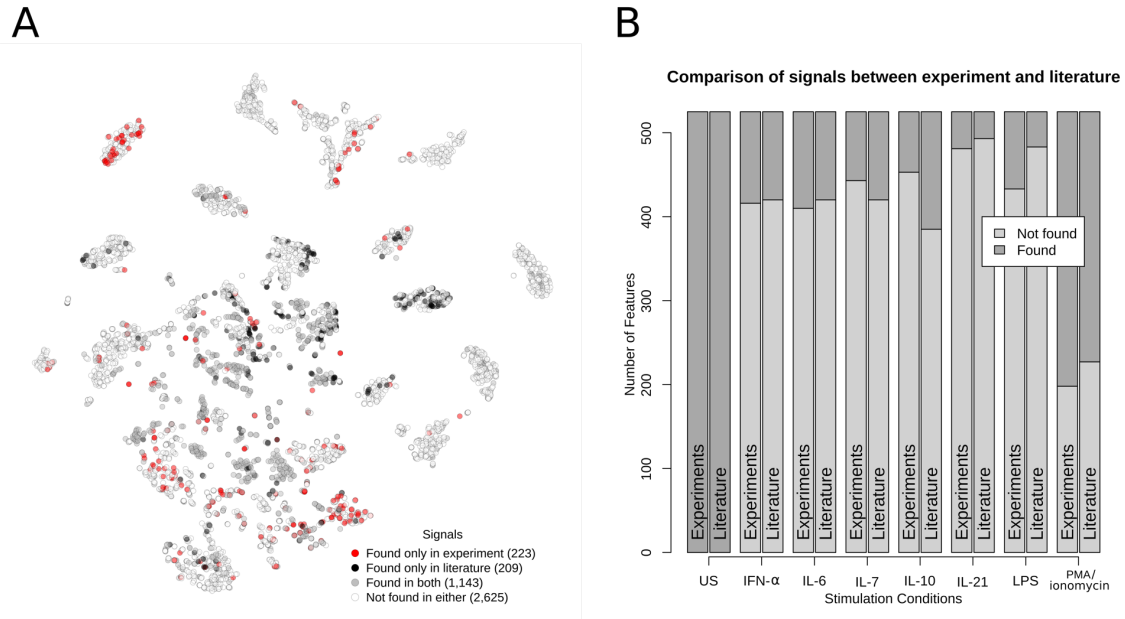

**Fig. S3. Portions of canonical responses that were expected based on published literature vs. those observed experimentally in this study.** (A), The correlation network colored by: responses that were expected based on published literature and also observed in this study (gray), those that were not expected from literature and were also not observed (white), and those that were expected from the literature but not observed experimentally or vice versa (black and red). (B), The portion of the responses that were expected based on published literature or observed experimentally in this study.

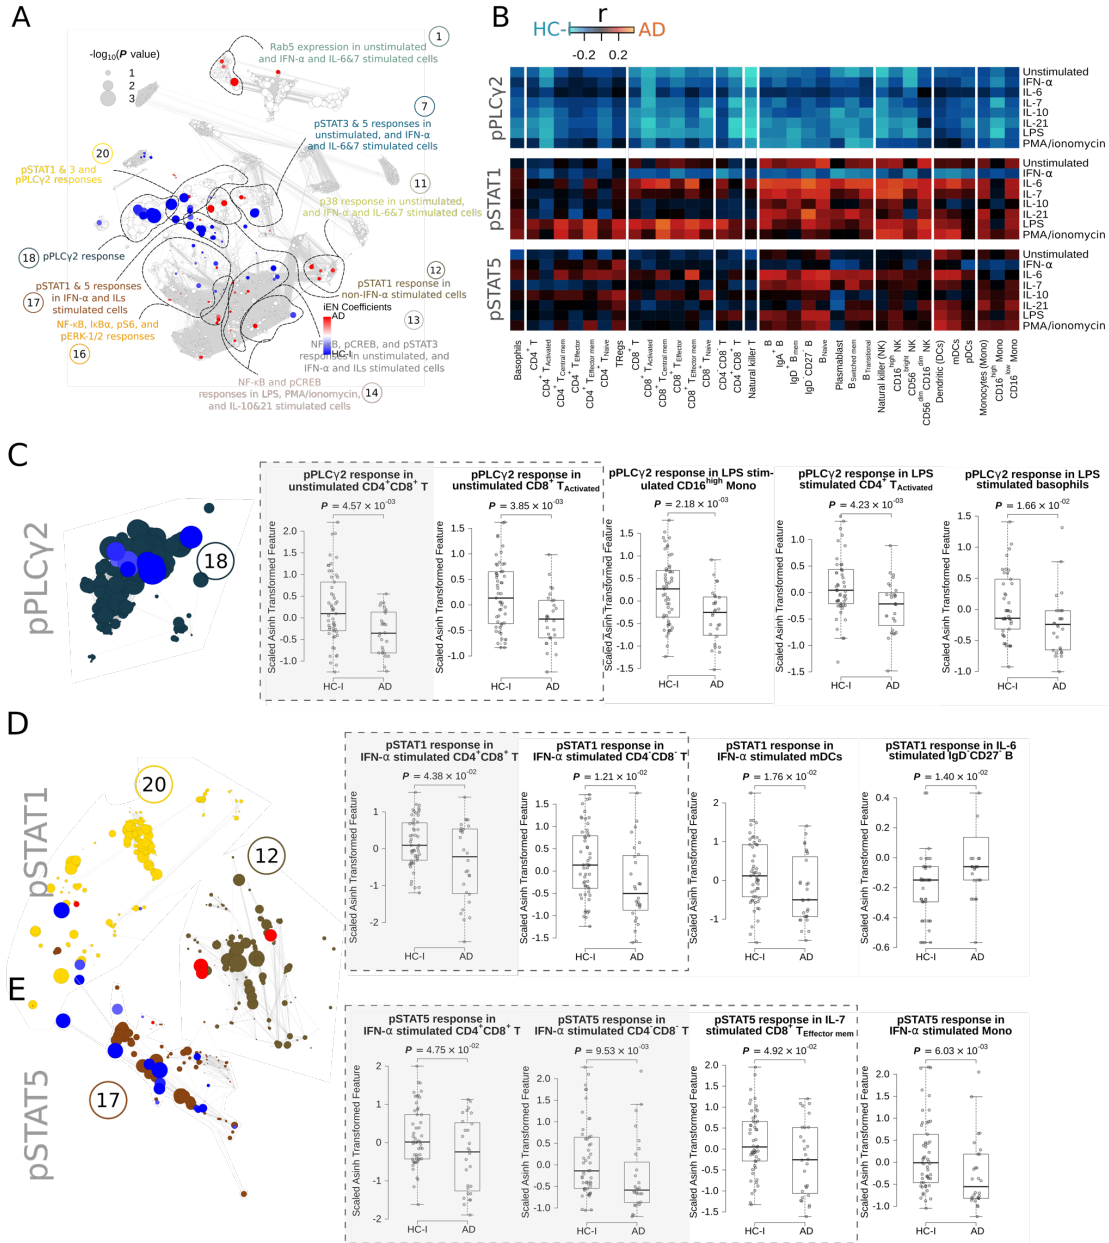

**Fig. S4. Visualizations of features with strong signals and other features associated with the 111 top iEN selected components. (A),** Network correlation with all the features associated with the top 111 iEN components colored. **(B),** heatmaps of the selected communities with magnitude colored by Spearman's correlation ( $r$ ) coefficients. **(C–E),** Box plots of the selected features in the communities. The shaded gray areas indicate that the features are also a part of reduced iEN's top 14 components, and the boxes indicate features that are among the top 111 components.

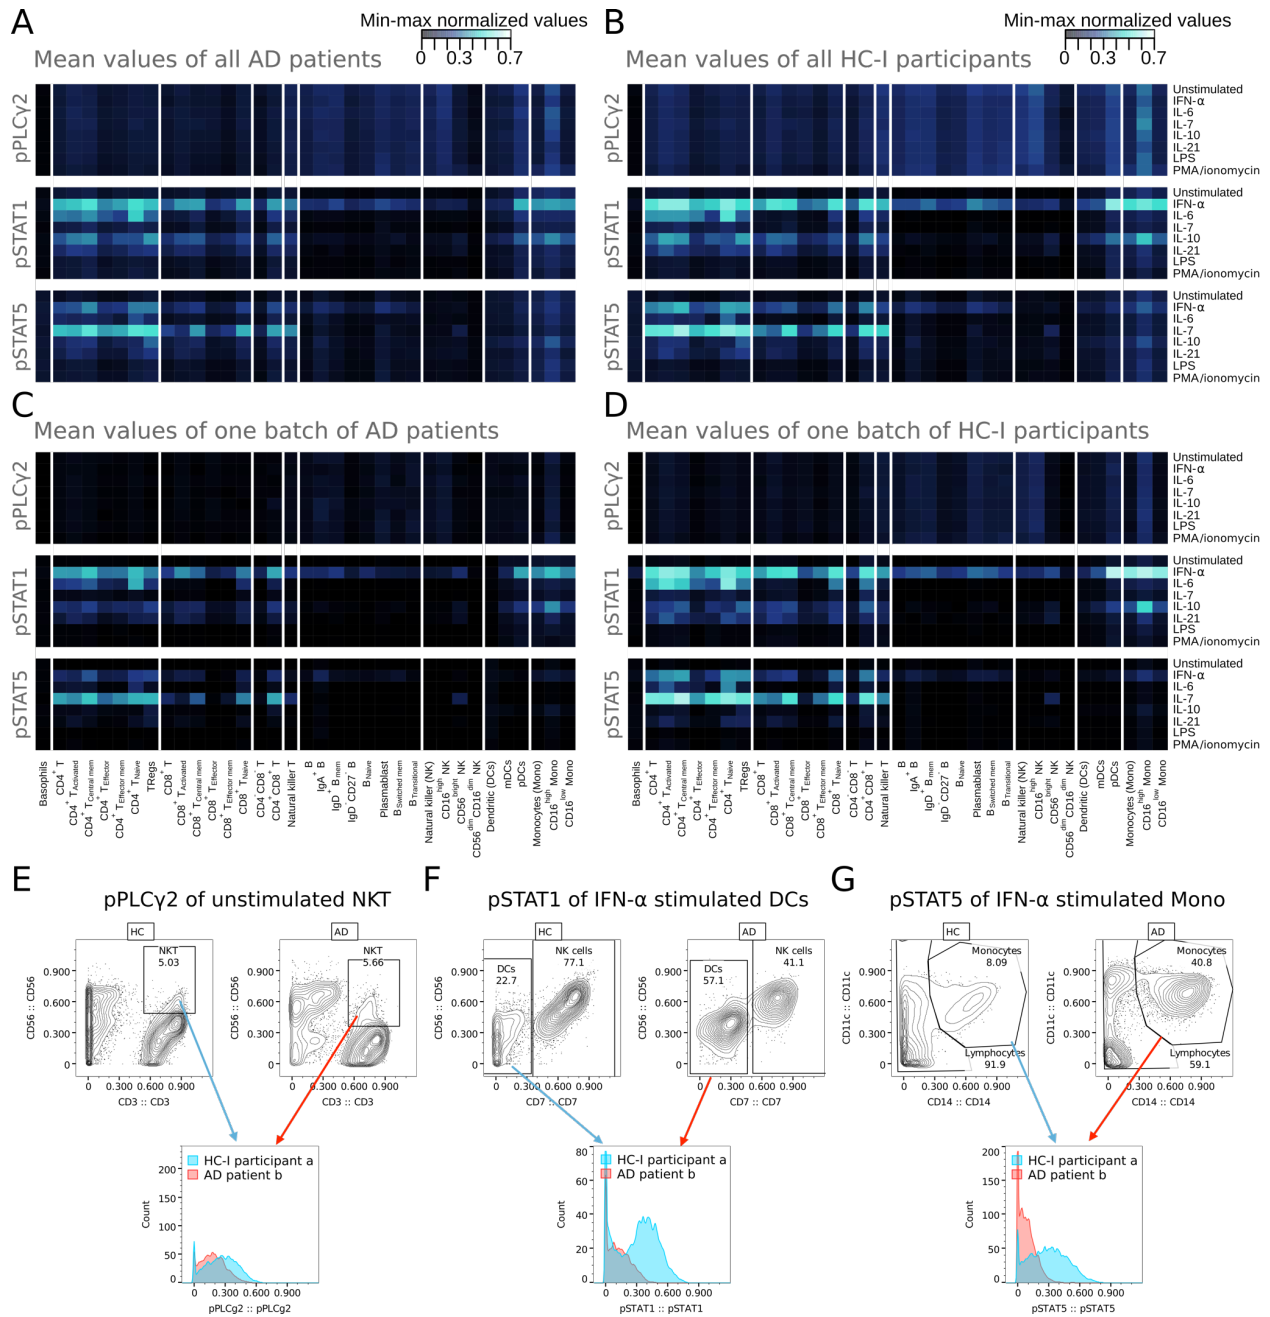

**Fig. S5. Responses of pPLCy2, pSTAT1, and pSTAT5 show expected expressions according to literature.** (A), Heatmaps of the mean values of normalized responses in each cell subset and stimulation for all AD patients in the discovery cohorts before batch correction. (B), Similar to (A) but for HC-I participants. (C), Similar heatmap with only AD patients of the biggest batch in the discovery cohort. (D), Similar to (C), but for HC-I participants. (E–G), Examples of raw gated signals with a corresponding density plot from a pair of participants.

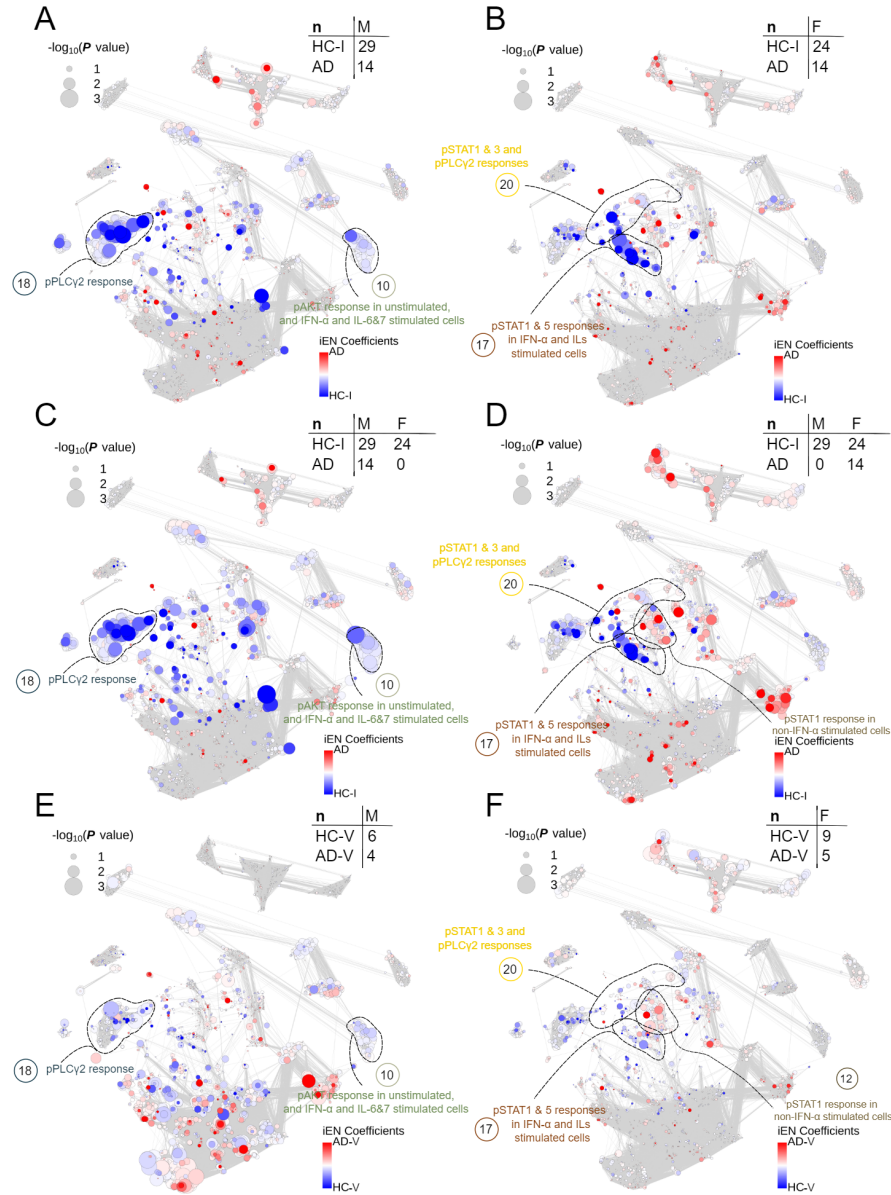

**Fig. S6. Correlation network for AD/HC separated by sex.** (A-B), The correlation network with node size corresponding to the Wilcoxon rank-sum test  $P$  value of each feature for AD/HC-I diagnosis in male and female participants (discovery cohort). (C-D), The similar correlation network for both sexes of healthy cohorts (HC-I) but for sex-specific AD. (E-F), The similar correlation network as (A-B) for the validation (V) data set. The color of each node represents the magnitude and direction of the associated iEN components developed from AD/HC-I classification model using all AD and HC-I data.



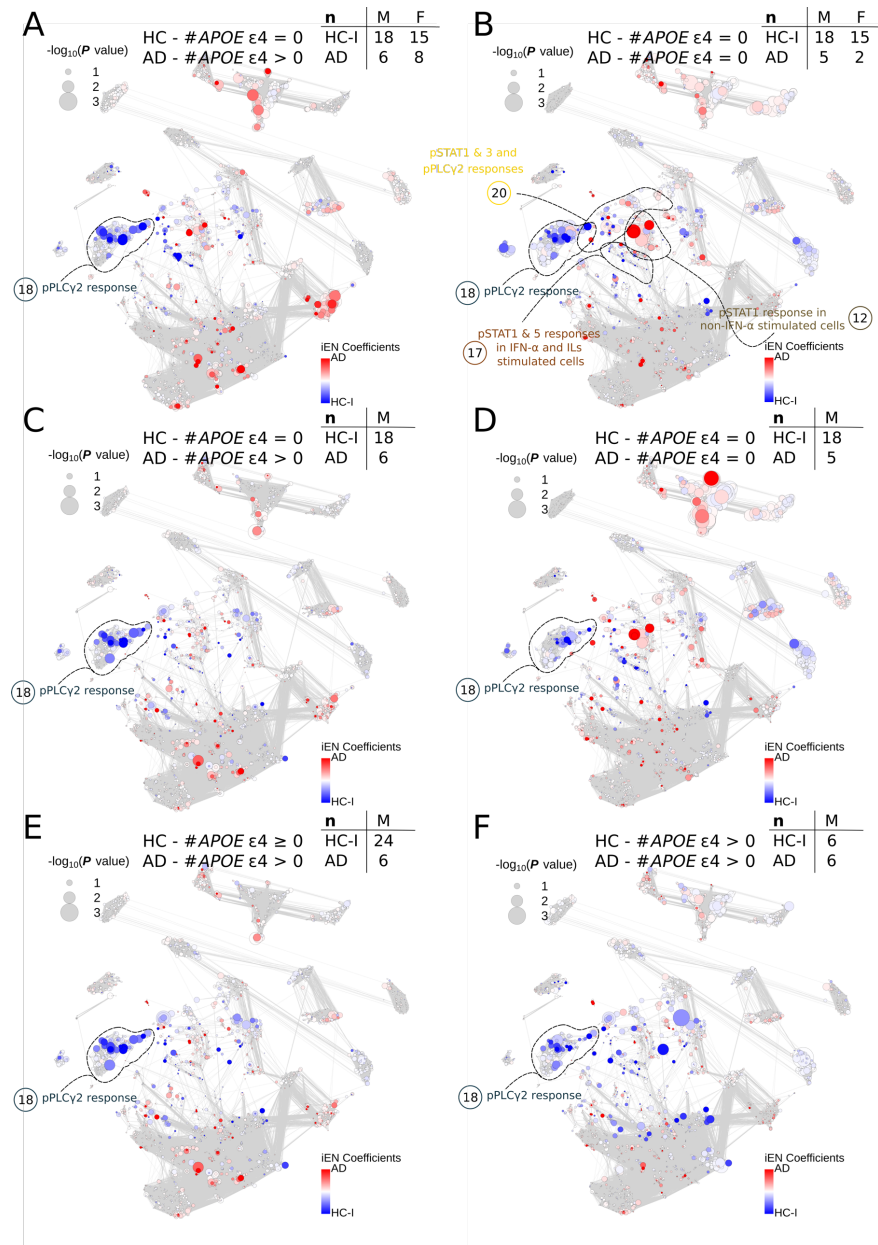

**Fig. S7. Correlation network for *APOE*  $\epsilon$ 4- allele effects in AD/HC.** (A), The correlation network of healthy cohorts (HC-I) with no *APOE*  $\epsilon$ 4 allele and Alzheimer's disease (AD) with at least one *APOE*  $\epsilon$ 4 allele. (B), Similar to (A), but for both groups with no *APOE*  $\epsilon$ 4 allele. (C-D), Similar correlation networks to (A) and (B) but for male participants only. (E), Similar correlation network to (C), but for all male HC-I. (F), A correlation network where all male participants have at least one *APOE*  $\epsilon$ 4 allele.



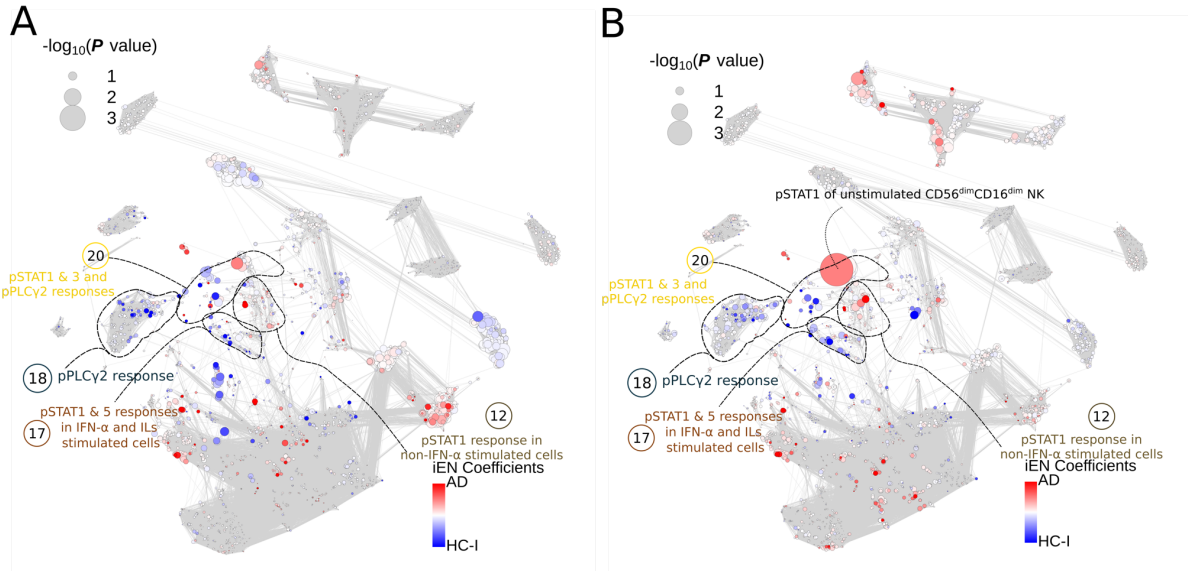

**Fig. S8. Correlation network of HC-II/HC-I and HC-II/AD indicating that age does not share key differential pSTATs and pPLC $\gamma$ 2 signals highlighted by HC-I/AD. (A), The correlation network with node size corresponding to the Wilcoxon rank-sum test  $P$  value of each feature for HC-II/HC-I. The color of each node represents the magnitude and direction of the associated iEN components developed from AD/HC-I classification. (B), Similar to (A), but for the HC-II/AD pair.**

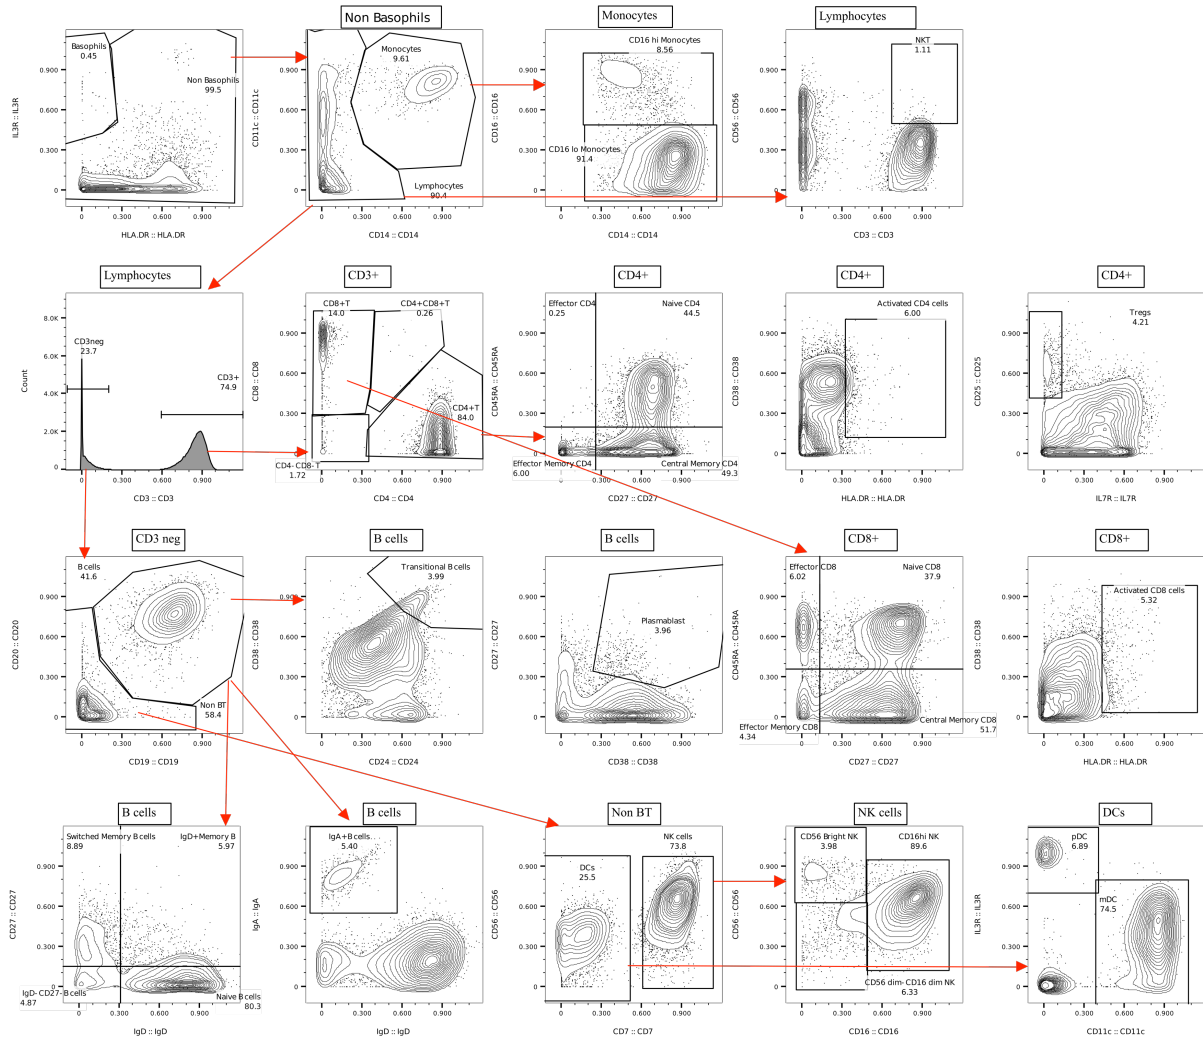

**Fig. S9. Gating strategy to obtain different cell subsets.** Thirty-five cell subsets were gated from PBMCs and a matrix of 12 phosphoepitopes and 3 endosomal proteins with 8 stimuli conditions evaluated from each subset. The DNA-high events of each sample were gated for basophils and non-basophils. Non-basophils were gated for monocytes, lymphocytes, CD3<sup>+</sup>, CD4<sup>+</sup>, CD8<sup>+</sup>, B cells, NK cells, and DCs. Each of these cell types was further divided into subpopulations. CD4<sup>+</sup> (effector, naive, central memory and effector memory), CD8<sup>+</sup> (effector, naive, central memory and effector memory), and B cells (switched memory, IgD<sup>+</sup> memory B, naive, IgD-CD27- B cells) were gated using quadrants.

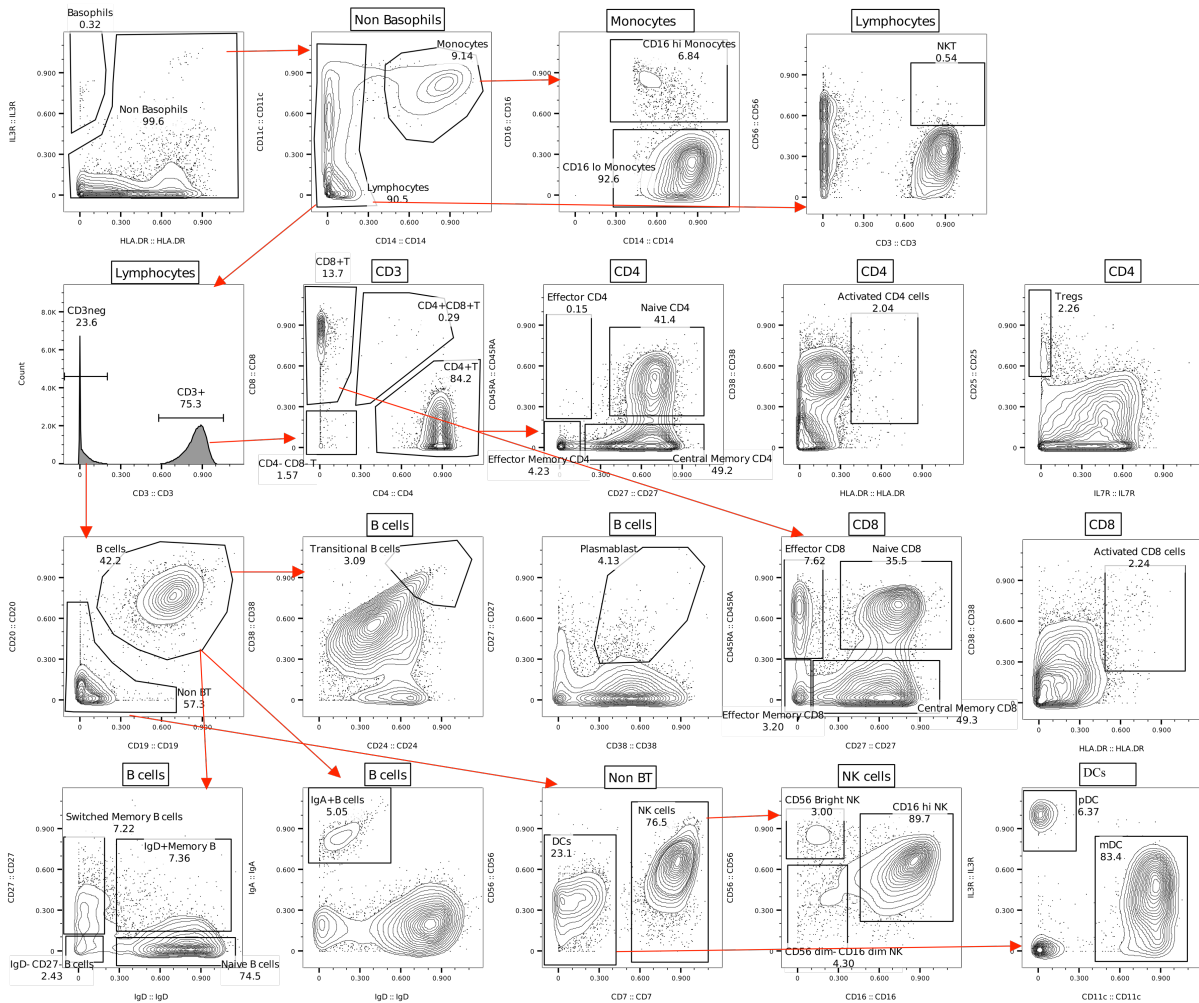

**Fig. S10. Alternate gating process strategy to obtain different cell subsets.** The same approach was used as in Fig. S9 with three modifications to the gating strategy: (i) Gates were adjusted to eliminate adjacent borders and ensure no overlap. This included non-basophils, monocytes, lymphocytes, CD4<sup>+</sup>, CD8<sup>+</sup>, Tregs, B cells, non-BT, IgA<sup>+</sup> B cells, NK cells, DCs, pDCs, and mDCs; (ii) The CD56<sup>+</sup> CD3<sup>+</sup> gate of NKT cells was revised to match the CD56<sup>+</sup> CD3<sup>-</sup> population; (iii) All quadrants were removed and specific gates applied to the following subpopulations: CD4<sup>+</sup> (effector, naive, central memory and effector memory), CD8<sup>+</sup> (effector, naive, central memory and effector memory), and B cells (switched memory, IgD<sup>+</sup> memory B, naive, IgD<sup>-</sup>CD27<sup>-</sup> B cells).

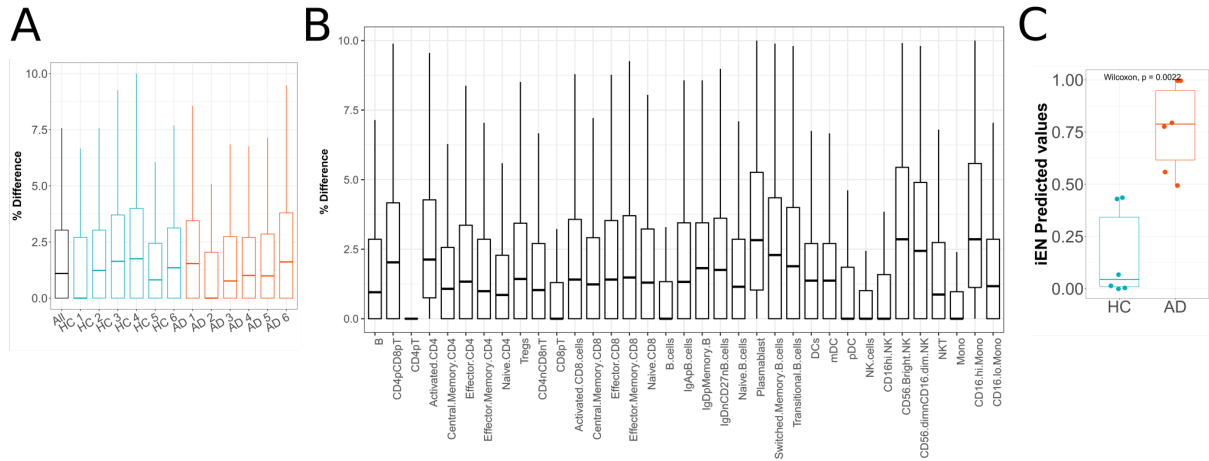

**Fig. S11. Consistent response with original and alternate gating strategies.** (A), Boxplot of percentage difference for each of the 4,200 median values resulting from the original (Fig. S9) and alternate (Fig. S10) gating schemes applied to each randomly selected sample. (B), Similar to (A), but stratified by cell type instead of sample. (C), iEN-predicted values from the alternate gating scheme using the iEN model developed from the original gating scheme.



| <b>Cluster 3 (n=24)</b>             |    |               |      |      |       |       |     |                   |
|-------------------------------------|----|---------------|------|------|-------|-------|-----|-------------------|
| <b>Signal: Lamp2 (n=24, 100%)</b>   |    |               |      |      |       |       |     |                   |
|                                     | US | IFN- $\alpha$ | IL-6 | IL-7 | IL-10 | IL-21 | LPS | PMA/<br>Ionomycin |
| Basophils                           | -  | -             | -    | -    | -     | -     | -   | -                 |
| CD4 <sup>+</sup> T                  | -  | -             | -    | -    | -     | -     | -   | -                 |
| CD8 <sup>+</sup> T                  | -  | -             | -    | -    | -     | -     | -   | -                 |
| CD4 <sup>+</sup> CD8 <sup>-</sup> T | -  | -             | -    | -    | -     | -     | -   | -                 |
| CD4 <sup>+</sup> CD8 <sup>+</sup> T | -  | -             | -    | -    | -     | -     | -   | -                 |
| NKT                                 | -  | -             | -    | -    | -     | -     | -   | -                 |
| B                                   | -  | -             | -    | -    | -     | -     | -   | -                 |
| NK                                  | -  | -             | -    | -    | -     | -     | -   | -                 |
| DCs                                 | -  | -             | -    | -    | -     | -     | -   | -                 |
| Monocytes                           | 3  | 3             | 3    | 3    | 3     | 3     | 3   | 3                 |
| <b>Cluster 4 (n=108)</b>            |    |               |      |      |       |       |     |                   |
| <b>Signal: Rab5 (n=108, 100%)</b>   |    |               |      |      |       |       |     |                   |
|                                     | US | IFN- $\alpha$ | IL-6 | IL-7 | IL-10 | IL-21 | LPS | PMA/<br>Ionomycin |
| Basophils                           | -  | -             | -    | -    | -     | -     | -   | -                 |
| CD4 <sup>+</sup> T                  | -  | -             | -    | -    | 5     | 5     | 5   | 5                 |
| CD8 <sup>+</sup> T                  | -  | -             | -    | -    | 4     | 4     | 4   | 4                 |
| CD4 <sup>+</sup> CD8 <sup>-</sup> T | -  | -             | -    | -    | 1     | 1     | 1   | 1                 |
| CD4 <sup>+</sup> CD8 <sup>+</sup> T | -  | -             | -    | -    | 1     | 1     | 1   | 1                 |
| NKT                                 | -  | -             | -    | -    | 1     | 1     | 1   | 1                 |
| B                                   | -  | -             | -    | -    | 5     | 5     | 5   | 5                 |
| NK                                  | -  | -             | -    | -    | 4     | 4     | 4   | 4                 |
| DCs                                 | -  | -             | -    | -    | 3     | 3     | 3   | 3                 |
| Monocytes                           | -  | -             | -    | -    | 3     | 3     | 3   | 3                 |
| <b>Cluster 5 (n=32)</b>             |    |               |      |      |       |       |     |                   |
| <b>Signal: Rab5 (n=32, 100%)</b>    |    |               |      |      |       |       |     |                   |
|                                     | US | IFN- $\alpha$ | IL-6 | IL-7 | IL-10 | IL-21 | LPS | PMA/<br>Ionomycin |
| Basophils                           | -  | -             | -    | -    | 1     | 1     | 1   | 1                 |
| CD4 <sup>+</sup> T                  | -  | -             | -    | -    | 2     | 2     | 2   | 2                 |
| CD8 <sup>+</sup> T                  | -  | -             | -    | -    | 2     | 2     | 2   | 2                 |

|                                     |   |   |   |   |   |   |   |   |
|-------------------------------------|---|---|---|---|---|---|---|---|
| CD4 <sup>+</sup> CD8 <sup>-</sup> T | - | - | - | - | - | - | - | - |
| CD4 <sup>+</sup> CD8 <sup>+</sup> T | - | - | - | - | - | - | - | - |
| NKT                                 | - | - | - | - | - | - | - | - |
| B                                   | - | - | - | - | 3 | 3 | 3 | 3 |
| NK                                  | - | - | - | - | - | - | - | - |
| DCs                                 | - | - | - | - | - | - | - | - |
| Monocytes                           | - | - | - | - | - | - | - | - |

### Cluster 6 (n=102)

Signal: ERK-1/2 (n=102, 100%)

|                                     | US | IFN- $\alpha$ | IL-6 | IL-7 | IL-10 | IL-21 | LPS | PMA/<br>Ionomycin |
|-------------------------------------|----|---------------|------|------|-------|-------|-----|-------------------|
| Basophils                           | -  | -             | -    | -    | 1     | 1     | 1   | 1                 |
| CD4 <sup>+</sup> T                  | -  | -             | -    | -    | 7     | 7     | 7   | -                 |
| CD8 <sup>+</sup> T                  | -  | -             | -    | -    | 6     | 6     | 6   | -                 |
| CD4 <sup>+</sup> CD8 <sup>-</sup> T | -  | -             | -    | -    | 1     | 1     | 1   | -                 |
| CD4 <sup>+</sup> CD8 <sup>+</sup> T | -  | -             | -    | -    | 1     | 1     | 1   | -                 |
| NKT                                 | -  | -             | -    | -    | 1     | 1     | 1   | -                 |
| B                                   | -  | -             | -    | -    | 8     | 8     | 8   | -                 |
| NK                                  | -  | -             | -    | -    | 4     | 4     | 4   | -                 |
| DCs                                 | -  | -             | -    | -    | 3     | 3     | 2   | -                 |
| Monocytes                           | -  | -             | -    | -    | 3     | 3     | -   | -                 |

### Cluster 7 (n=186)

Signal: pSTAT5 (n=102, 55%)

|                                     | US | IFN- $\alpha$ | IL-6 | IL-7 | IL-10 | IL-21 | LPS | PMA/<br>Ionomycin |
|-------------------------------------|----|---------------|------|------|-------|-------|-----|-------------------|
| Basophils                           | 1  | 1             | 1    | 1    | -     | -     | -   | -                 |
| CD4 <sup>+</sup> T                  | 7  | -             | 5    | -    | -     | -     | -   | -                 |
| CD8 <sup>+</sup> T                  | 6  | -             | 6    | -    | -     | -     | -   | -                 |
| CD4 <sup>+</sup> CD8 <sup>-</sup> T | 1  | 1             | 1    | -    | -     | -     | -   | -                 |
| CD4 <sup>+</sup> CD8 <sup>+</sup> T | 1  | -             | 1    | -    | -     | -     | -   | -                 |
| NKT                                 | 1  | -             | 1    | -    | -     | -     | -   | -                 |
| B                                   | 8  | 4             | 8    | 8    | -     | -     | -   | -                 |
| NK                                  | 4  | 4             | 4    | 3    | -     | -     | -   | -                 |
| DCs                                 | 3  | 3             | 3    | 3    | -     | -     | -   | -                 |

|                                                  |    |               |      |      |       |       |     |                   |
|--------------------------------------------------|----|---------------|------|------|-------|-------|-----|-------------------|
| Monocytes                                        | 3  | 3             | 3    | 3    | -     | -     | -   | -                 |
| <b>Signal: pSTAT3 (n=72, 39%)</b>                |    |               |      |      |       |       |     |                   |
|                                                  | US | IFN- $\alpha$ | IL-6 | IL-7 | IL-10 | IL-21 | LPS | PMA/<br>Ionomycin |
| Basophils                                        | 1  | 1             | 1    | 1    | -     | -     | -   | -                 |
| CD4 <sup>+</sup> T                               | 5  | -             | -    | 1    | -     | -     | -   | -                 |
| CD8 <sup>+</sup> T                               | 6  | -             | 4    | 5    | -     | -     | -   | -                 |
| CD4 <sup>+</sup> CD8 <sup>-</sup> T              | 1  | -             | 1    | 1    | -     | -     | -   | -                 |
| CD4 <sup>+</sup> CD8 <sup>+</sup> T              | 1  | -             | -    | 1    | -     | -     | -   | -                 |
| NKT                                              | 1  | -             | -    | 1    | -     | -     | -   | -                 |
| B                                                | 5  | -             | 6    | 6    | -     | -     | -   | -                 |
| NK                                               | 3  | 1             | 3    | 3    | -     | -     | -   | -                 |
| DCs                                              | 3  | 2             | 2    | 3    | -     | -     | -   | -                 |
| Monocytes                                        | 1  | -             | 1    | 1    | -     | -     | -   | -                 |
| <b>Signal: pSTAT1 (n=4, 2%)</b>                  |    |               |      |      |       |       |     |                   |
|                                                  | US | IFN- $\alpha$ | IL-6 | IL-7 | IL-10 | IL-21 | LPS | PMA/<br>Ionomycin |
| All                                              | 1  | -             | -    | 1    | -     | -     | 1   | 1                 |
| <b>Signal: NF-<math>\kappa</math>B (n=2, 1%)</b> |    |               |      |      |       |       |     |                   |
|                                                  | US | IFN- $\alpha$ | IL-6 | IL-7 | IL-10 | IL-21 | LPS | PMA/<br>Ionomycin |
| All                                              | -  | 1             | -    | 1    | -     | -     | -   | -                 |
| <b>Signal: p38 (n=2, 1%)</b>                     |    |               |      |      |       |       |     |                   |
|                                                  | US | IFN- $\alpha$ | IL-6 | IL-7 | IL-10 | IL-21 | LPS | PMA/<br>Ionomycin |
| All                                              | -  | 1             | -    | 1    | -     | -     | -   | -                 |
| <b>Signal: pLCK (n=2, 1%)</b>                    |    |               |      |      |       |       |     |                   |
|                                                  | US | IFN- $\alpha$ | IL-6 | IL-7 | IL-10 | IL-21 | LPS | PMA/<br>Ionomycin |
| All                                              | -  | 1             | -    | 1    | -     | -     | -   | -                 |
| <b>Signal: pCREB (n=1, 1%)</b>                   |    |               |      |      |       |       |     |                   |
|                                                  | US | IFN- $\alpha$ | IL-6 | IL-7 | IL-10 | IL-21 | LPS | PMA/<br>Ionomycin |
| All                                              | -  | 1             | -    | -    | -     | -     | -   | -                 |
| <b>Signal: ERK-1/2 (n=1, 1%)</b>                 |    |               |      |      |       |       |     |                   |
|                                                  | US | IFN- $\alpha$ | IL-6 | IL-7 | IL-10 | IL-21 | LPS | PMA/<br>Ionomycin |



|                                      |    |               |      |      |       |       |     |                                |
|--------------------------------------|----|---------------|------|------|-------|-------|-----|--------------------------------|
| All                                  | -  | -             | -    | -    | -     | -     | -   | 1                              |
| <b>Cluster 8 (n=142)</b>             |    |               |      |      |       |       |     |                                |
| <b>Signal: EEA1 (n=140, 99%)</b>     |    |               |      |      |       |       |     |                                |
|                                      | US | IFN- $\alpha$ | IL-6 | IL-7 | IL-10 | IL-21 | LPS | PMA/<br>Ionomycin <sub>n</sub> |
| Basophils                            | 1  | 1             | 1    | 1    | -     | -     | -   | -                              |
| CD4 <sup>+</sup> T                   | 7  | 7             | 7    | 7    | -     | -     | -   | -                              |
| CD8 <sup>+</sup> T                   | 6  | 6             | 6    | 6    | -     | -     | -   | -                              |
| CD4 <sup>+</sup> CD8 <sup>-</sup> T  | 1  | 1             | 1    | 1    | -     | -     | -   | -                              |
| CD4 <sup>+</sup> CD8 <sup>+</sup> T  | 1  | 1             | 1    | 1    | -     | -     | -   | -                              |
| NKT                                  | 1  | 1             | 1    | 1    | -     | -     | -   | -                              |
| B                                    | 8  | 8             | 8    | 8    | -     | -     | -   | -                              |
| NK                                   | 4  | 4             | 4    | 4    | -     | -     | -   | -                              |
| DCs                                  | 3  | 3             | 3    | 3    | -     | -     | -   | -                              |
| Monocytes                            | 3  | 3             | 3    | 3    | -     | -     | -   | -                              |
| <b>Signal: ERK-1/2 (n=2, 1%)</b>     |    |               |      |      |       |       |     |                                |
|                                      | US | IFN- $\alpha$ | IL-6 | IL-7 | IL-10 | IL-21 | LPS | PMA/<br>Ionomycin              |
| All                                  | -  | 1             | -    | 1    | -     | -     | -   | -                              |
| <b>Cluster 9 (n=138)</b>             |    |               |      |      |       |       |     |                                |
| <b>Signal: ERK-1/2 (n=138, 100%)</b> |    |               |      |      |       |       |     |                                |
|                                      | US | IFN- $\alpha$ | IL-6 | IL-7 | IL-10 | IL-21 | LPS | PMA/<br>Ionomycin              |
| Basophils                            | 1  | 1             | 1    | 1    | -     | -     | -   | -                              |
| CD4 <sup>+</sup> T                   | 7  | 7             | 7    | 7    | -     | -     | -   | -                              |
| CD8 <sup>+</sup> T                   | 6  | 6             | 6    | 6    | -     | -     | -   | -                              |
| CD4 <sup>+</sup> CD8 <sup>-</sup> T  | 1  | 1             | 1    | 1    | -     | -     | -   | -                              |
| CD4 <sup>+</sup> CD8 <sup>+</sup> T  | 1  | 1             | 1    | 1    | -     | -     | -   | -                              |
| NKT                                  | 1  | 1             | 1    | 1    | -     | -     | -   | -                              |
| B                                    | 8  | 7             | 8    | 7    | -     | -     | -   | -                              |
| NK                                   | 4  | 4             | 4    | 4    | -     | -     | -   | -                              |
| DCs                                  | 3  | 3             | 3    | 3    | -     | -     | -   | -                              |
| Monocytes                            | 3  | 3             | 3    | 3    | -     | -     | -   | -                              |
| <b>Cluster 10 (n=138)</b>            |    |               |      |      |       |       |     |                                |
| <b>Signal: pAKT (n=138, 100%)</b>    |    |               |      |      |       |       |     |                                |

|                                     | US | IFN- $\alpha$ | IL-6 | IL-7 | IL-10 | IL-21 | LPS | PMA/<br>Ionomycin |
|-------------------------------------|----|---------------|------|------|-------|-------|-----|-------------------|
| Basophils                           | 1  | 1             | 1    | 1    | -     | -     | -   | -                 |
| CD4 <sup>+</sup> T                  | 7  | 7             | 7    | 7    | -     | -     | -   | -                 |
| CD8 <sup>+</sup> T                  | 6  | 6             | 6    | 6    | -     | -     | -   | -                 |
| CD4 <sup>+</sup> CD8 <sup>+</sup> T | 1  | 1             | 1    | 1    | -     | -     | -   | -                 |
| CD4 <sup>+</sup> CD8 <sup>+</sup> T | 1  | 1             | 1    | 1    | -     | -     | -   | -                 |
| NKT                                 | 1  | 1             | 1    | 1    | -     | -     | -   | -                 |
| B                                   | 8  | 7             | 8    | 7    | -     | -     | -   | -                 |
| NK                                  | 4  | 4             | 4    | 4    | -     | -     | -   | -                 |
| DCs                                 | 3  | 3             | 3    | 3    | -     | -     | -   | -                 |
| Monocytes                           | 3  | 3             | 3    | 3    | -     | -     | -   | -                 |

### Cluster 11 (n=154)

Signal: p38 (n=144, 94%)

|                                     | US | IFN- $\alpha$ | IL-6 | IL-7 | IL-10 | IL-21 | LPS | PMA/<br>Ionomycin |
|-------------------------------------|----|---------------|------|------|-------|-------|-----|-------------------|
| Basophils                           | 1  | 1             | 1    | 1    | -     | -     | -   | -                 |
| CD4 <sup>+</sup> T                  | 7  | 7             | 7    | 7    | -     | -     | -   | -                 |
| CD8 <sup>+</sup> T                  | 6  | 6             | 6    | 6    | -     | -     | -   | -                 |
| CD4 <sup>+</sup> CD8 <sup>+</sup> T | 1  | 1             | 1    | 1    | -     | -     | -   | -                 |
| CD4 <sup>+</sup> CD8 <sup>+</sup> T | 1  | 1             | 1    | 1    | -     | -     | -   | -                 |
| NKT                                 | 1  | 1             | 1    | 1    | -     | -     | -   | -                 |
| B                                   | 8  | 7             | 8    | 7    | -     | -     | -   | -                 |
| NK                                  | 4  | 4             | 4    | 4    | -     | -     | -   | -                 |
| DCs                                 | 3  | 3             | 3    | 3    | 1     | 1     | -   | -                 |
| Monocytes                           | 3  | 3             | 3    | 3    | 2     | 2     | -   | -                 |

Signal: NF- $\kappa$ B (n=5, 3%)

|     | US | IFN- $\alpha$ | IL-6 | IL-7 | IL-10 | IL-21 | LPS | PMA /<br>Ionomycin |
|-----|----|---------------|------|------|-------|-------|-----|--------------------|
| All | 2  | 1             | 1    | 1    | -     | -     | -   | -                  |

Signal: pSTAT3 (n=4, 3%)

|     | US | IFN- $\alpha$ | IL-6 | IL-7 | IL-10 | IL-21 | LPS | PMA /<br>Ionomycin |
|-----|----|---------------|------|------|-------|-------|-----|--------------------|
| All | 2  | -             | -    | 2    | -     | -     | -   | -                  |

Signal: pCREB (n=1, 1%)

|                                     | US | IFN- $\alpha$ | IL-6 | IL-7 | IL-10 | IL-21 | LPS | PMA / Ionomycin |
|-------------------------------------|----|---------------|------|------|-------|-------|-----|-----------------|
| All                                 | -  | -             | -    | 1    | -     | -     | -   | -               |
| <b>Cluster 12 (n=128)</b>           |    |               |      |      |       |       |     |                 |
| <b>Signal: pSTAT1 (n=121, 95%)</b>  |    |               |      |      |       |       |     |                 |
|                                     | US | IFN- $\alpha$ | IL-6 | IL-7 | IL-10 | IL-21 | LPS | PMA / Ionomycin |
| Basophils                           | -  | -             | -    | -    | -     | -     | -   | -               |
| CD4 <sup>+</sup> T                  | 4  | -             | -    | 6    | -     | -     | 7   | 5               |
| CD8 <sup>+</sup> T                  | 6  | -             | 3    | 6    | -     | -     | 6   | 6               |
| CD4 <sup>+</sup> CD8 <sup>-</sup> T | 1  | -             | 1    | 1    | -     | -     | 1   | 1               |
| CD4 <sup>+</sup> CD8 <sup>+</sup> T | -  | -             | -    | 1    | -     | -     | 1   | 1               |
| NKT                                 | 1  | -             | -    | 1    | -     | -     | 1   | 1               |
| B                                   | -  | -             | 1    | -    | 8     | 8     | 1   | 1               |
| NK                                  | -  | -             | -    | -    | 3     | 2     | -   | -               |
| DCs                                 | 3  | -             | 3    | 3    | -     | 3     | 3   | 3               |
| Monocytes                           | 3  | -             | 3    | 3    | -     | 3     | 3   | 3               |
| <b>Signal: pSTAT3 (n=5, 4%)</b>     |    |               |      |      |       |       |     |                 |
|                                     | US | IFN- $\alpha$ | IL-6 | IL-7 | IL-10 | IL-21 | LPS | PMA / Ionomycin |
| All                                 | -  | -             | -    | 2    | 1     | 2     | -   | -               |
| <b>Signal: pSTAT5 (n=2, 2%)</b>     |    |               |      |      |       |       |     |                 |
|                                     | US | IFN- $\alpha$ | IL-6 | IL-7 | IL-10 | IL-21 | LPS | PMA / Ionomycin |
| All                                 | -  | -             | -    | -    | 1     | 1     | -   | -               |
| <b>Cluster 13 (n=335)</b>           |    |               |      |      |       |       |     |                 |
| <b>Signal: pCREB (n=137, 41%)</b>   |    |               |      |      |       |       |     |                 |
|                                     | US | IFN- $\alpha$ | IL-6 | IL-7 | IL-10 | IL-21 | LPS | PMA / Ionomycin |
| Basophils                           | 1  | 1             | 1    | 1    | -     | -     | -   | -               |
| CD4 <sup>+</sup> T                  | 7  | 7             | 7    | 7    | -     | -     | -   | -               |
| CD8 <sup>+</sup> T                  | 6  | 6             | 6    | 6    | -     | -     | -   | -               |
| CD4 <sup>+</sup> CD8 <sup>-</sup> T | 1  | 1             | 1    | 1    | -     | -     | -   | 1               |
| CD4 <sup>+</sup> CD8 <sup>+</sup> T | 1  | 1             | 1    | 1    | -     | -     | -   | -               |
| NKT                                 | 1  | 1             | 1    | 1    | -     | -     | -   | -               |
| B                                   | 8  | 7             | 8    | 7    | -     | -     | -   | -               |



|                                     |   |   |   |   |   |   |   |   |
|-------------------------------------|---|---|---|---|---|---|---|---|
| CD4 <sup>+</sup> CD8 <sup>+</sup> T | - | - | - | - | - | - | - | - |
| CD4 <sup>+</sup> CD8 <sup>+</sup> T | - | - | - | - | - | - | - | - |
| NKT                                 | - | - | - | - | - | - | - | - |
| B                                   | - | - | - | - | - | - | - | - |
| NK                                  | 2 | 2 | 2 | 2 | 2 | 2 | 2 | - |
| DCs                                 | - | - | - | - | - | - | - | - |
| Monocytes                           | - | - | - | - | - | - | - | - |

**Cluster 14 (n=287)**

**Signal: pCREB (n=134, 47%)**

|                                     | US | IFN- $\alpha$ | IL-6 | IL-7 | IL-10 | IL-21 | LPS | PMA / Ionomycin |
|-------------------------------------|----|---------------|------|------|-------|-------|-----|-----------------|
| Basophils                           | -  | -             | -    | -    | 1     | 1     | 1   | 1               |
| CD4 <sup>+</sup> T                  | -  | -             | -    | -    | 7     | 7     | 7   | 7               |
| CD8 <sup>+</sup> T                  | -  | -             | -    | -    | 6     | 6     | 6   | 6               |
| CD4 <sup>+</sup> CD8 <sup>+</sup> T | -  | -             | -    | -    | 1     | 1     | 1   | -               |
| CD4 <sup>+</sup> CD8 <sup>+</sup> T | -  | -             | -    | -    | 1     | 1     | 1   | 1               |
| NKT                                 | -  | -             | -    | -    | 1     | 1     | 1   | 1               |
| B                                   | -  | -             | -    | -    | 8     | 8     | 8   | 7               |
| NK                                  | -  | -             | -    | -    | 4     | 4     | 4   | 3               |
| DCs                                 | -  | -             | -    | -    | 3     | 3     | 3   | 1               |
| Monocytes                           | -  | -             | -    | -    | 3     | 3     | 3   | 2               |

**Signal: NF- $\kappa$ B (n=124, 43%)**

|                                     | US | IFN- $\alpha$ | IL-6 | IL-7 | IL-10 | IL-21 | LPS | PMA / Ionomycin |
|-------------------------------------|----|---------------|------|------|-------|-------|-----|-----------------|
| Basophils                           | -  | -             | -    | -    | 1     | 1     | 1   | 1               |
| CD4 <sup>+</sup> T                  | 1  | 1             | 1    | 1    | 7     | 7     | 7   | 7               |
| CD8 <sup>+</sup> T                  | -  | -             | -    | -    | 2     | 2     | 2   | 3               |
| CD4 <sup>+</sup> CD8 <sup>+</sup> T | -  | -             | -    | -    | 1     | 1     | 1   | 1               |
| CD4 <sup>+</sup> CD8 <sup>+</sup> T | -  | -             | -    | -    | -     | -     | -   | -               |
| NKT                                 | -  | -             | -    | -    | -     | -     | -   | -               |
| B                                   | 1  | 1             | 1    | 1    | 8     | 8     | 8   | 8               |
| NK                                  | -  | -             | -    | -    | 4     | 4     | 4   | 4               |
| DCs                                 | -  | -             | -    | -    | 2     | 2     | 2   | 2               |
| Monocytes                           | 1  | 1             | -    | 1    | 3     | 3     | 3   | 3               |



|                                     |    |       |      |      |       |       |     |                 |
|-------------------------------------|----|-------|------|------|-------|-------|-----|-----------------|
| CD4 <sup>+</sup> CD8 <sup>+</sup> T | 1  | 1     | 1    | 1    | 1     | 1     | 1   | 1               |
| CD4 <sup>+</sup> CD8 <sup>+</sup> T | 1  | 1     | 1    | 1    | 1     | 1     | 1   | 1               |
| NKT                                 | 1  | 1     | 1    | 1    | 1     | 1     | 1   | 1               |
| B                                   | 8  | 8     | 8    | 8    | 8     | 8     | 8   | 7               |
| NK                                  | 2  | 1     | 1    | 2    | 2     | 2     | 2   | 4               |
| DCs                                 | 3  | 3     | 3    | 3    | 3     | 3     | 3   | 3               |
| Monocytes                           | 3  | 3     | 3    | 2    | 3     | 3     | 2   | 3               |
| <b>Signal: NF-κβ (n=52, 12%)</b>    |    |       |      |      |       |       |     |                 |
|                                     | US | IFN-α | IL-6 | IL-7 | IL-10 | IL-21 | LPS | PMA / Ionomycin |
| Basophils                           | -  | -     | -    | -    | -     | -     | -   | -               |
| CD4 <sup>+</sup> T                  | 1  | 1     | 1    | 1    | -     | -     | -   | -               |
| CD8 <sup>+</sup> T                  | 4  | 4     | 4    | 4    | 4     | 4     | 4   | 3               |
| CD4 <sup>+</sup> CD8 <sup>+</sup> T | -  | -     | -    | -    | -     | -     | -   | -               |
| CD4 <sup>+</sup> CD8 <sup>+</sup> T | 1  | 1     | 1    | 1    | 1     | 1     | 1   | 1               |
| NKT                                 | 1  | 1     | 1    | 1    | 1     | 1     | 1   | 1               |
| B                                   | -  | -     | -    | -    | -     | -     | -   | -               |
| NK                                  | -  | -     | -    | -    | -     | -     | -   | -               |
| DCs                                 | -  | -     | -    | -    | -     | -     | -   | -               |
| Monocytes                           | -  | -     | 1    | -    | -     | -     | -   | -               |
| <b>Signal: pS6 (n=47, 11%)</b>      |    |       |      |      |       |       |     |                 |
|                                     | US | IFN-α | IL-6 | IL-7 | IL-10 | IL-21 | LPS | PMA / Ionomycin |
| Basophils                           | 1  | 1     | 1    | 1    | 1     | 1     | 1   | 1               |
| CD4 <sup>+</sup> T                  | -  | -     | -    | -    | -     | -     | -   | 7               |
| CD8 <sup>+</sup> T                  | -  | -     | -    | -    | -     | -     | -   | 6               |
| CD4 <sup>+</sup> CD8 <sup>+</sup> T | -  | -     | -    | -    | -     | -     | -   | 1               |
| CD4 <sup>+</sup> CD8 <sup>+</sup> T | -  | -     | -    | -    | -     | -     | -   | 1               |
| NKT                                 | -  | -     | -    | -    | -     | -     | -   | 1               |
| B                                   | -  | -     | -    | -    | -     | -     | -   | 8               |
| NK                                  | -  | -     | -    | -    | -     | -     | -   | 4               |
| DCs                                 | 1  | 1     | 1    | 1    | 1     | 1     | 1   | 1               |
| Monocytes                           | -  | -     | -    | -    | -     | -     | -   | 3               |
| <b>Signal: ERK-1/2 (n=34, 8%)</b>   |    |       |      |      |       |       |     |                 |







|                                                                   |    |               |      |      |       |       |     |                 |
|-------------------------------------------------------------------|----|---------------|------|------|-------|-------|-----|-----------------|
| CD4 <sup>+</sup> CD8 <sup>+</sup> T                               | 1  | 1             | 1    | 1    | 1     | 1     | 1   | 1               |
| NKT                                                               | 1  | 1             | 1    | 1    | 1     | 1     | 1   | 1               |
| B                                                                 | 8  | 7             | 8    | 8    | 8     | 8     | 8   | 7               |
| NK                                                                | 3  | 3             | 3    | 3    | 3     | 3     | 3   | 3               |
| DCs                                                               | 3  | 3             | 3    | 3    | 3     | 3     | 3   | 3               |
| Monocytes                                                         | 3  | 3             | 3    | 3    | 3     | 3     | 3   | 3               |
| <b>Signals: pS6 (n=14, 5%)</b>                                    |    |               |      |      |       |       |     |                 |
|                                                                   | US | IFN- $\alpha$ | IL-6 | IL-7 | IL-10 | IL-21 | LPS | PMA / Ionomycin |
| All                                                               | 1  | 2             | 2    | 1    | 2     | 1     | 3   | 2               |
| <b>Signal: pSTAT3 (n=5, 2%)</b>                                   |    |               |      |      |       |       |     |                 |
|                                                                   | US | IFN- $\alpha$ | IL-6 | IL-7 | IL-10 | IL-21 | LPS | PMA / Ionomycin |
| All                                                               | -  | 2             | -    | -    | 3     | -     | -   | -               |
| <b>Signal: pSTAT5 (n=3, 1%)</b>                                   |    |               |      |      |       |       |     |                 |
|                                                                   | US | IFN- $\alpha$ | IL-6 | IL-7 | IL-10 | IL-21 | LPS | PMA / Ionomycin |
| All                                                               | -  | 3             | -    | -    | -     | -     | -   | -               |
| <b>Signal: pSTAT1 (n=3, 1%)</b>                                   |    |               |      |      |       |       |     |                 |
|                                                                   | US | IFN- $\alpha$ | IL-6 | IL-7 | IL-10 | IL-21 | LPS | PMA / Ionomycin |
| All                                                               | -  | 1             | -    | -    | 2     | -     | -   | -               |
| <b>Signal: I<math>\kappa</math>B<math>\alpha</math> (n=2, 1%)</b> |    |               |      |      |       |       |     |                 |
|                                                                   | US | IFN- $\alpha$ | IL-6 | IL-7 | IL-10 | IL-21 | LPS | PMA / Ionomycin |
| All                                                               | -  | 1             | 1    | -    | -     | -     | -   | -               |
| <b>Cluster 19 (n=71)</b>                                          |    |               |      |      |       |       |     |                 |
| <b>Signal: pS6 (n=71, 100%)</b>                                   |    |               |      |      |       |       |     |                 |
|                                                                   | US | IFN- $\alpha$ | IL-6 | IL-7 | IL-10 | IL-21 | LPS | PMA / Ionomycin |
| Basophils                                                         | -  | -             | -    | -    | -     | -     | -   | -               |
| CD4 <sup>+</sup> T                                                | -  | -             | -    | -    | -     | -     | -   | -               |
| CD8 <sup>+</sup> T                                                | -  | -             | -    | -    | -     | -     | -   | -               |
| CD4 <sup>-</sup> CD8 <sup>-</sup> T                               | -  | -             | -    | -    | -     | -     | -   | -               |
| CD4 <sup>+</sup> CD8 <sup>+</sup> T                               | -  | -             | -    | -    | -     | -     | -   | -               |
| NKT                                                               | -  | -             | -    | -    | -     | -     | -   | -               |
| B                                                                 | 8  | 7             | 8    | 7    | 8     | 8     | 8   | -               |

|                                                    |    |               |      |      |       |       |     |                 |
|----------------------------------------------------|----|---------------|------|------|-------|-------|-----|-----------------|
| NK                                                 | -  | -             | -    | -    | -     | -     | -   | -               |
| DCs                                                | 1  | -             | -    | 1    | -     | 1     | -   | -               |
| Monocytes                                          | 2  | 2             | 2    | 2    | 2     | 2     | 2   | -               |
| <b>Cluster 20 (n=169)</b>                          |    |               |      |      |       |       |     |                 |
| <b>Signal: pSTAT1 (n=76, 45%)</b>                  |    |               |      |      |       |       |     |                 |
|                                                    | US | IFN- $\alpha$ | IL-6 | IL-7 | IL-10 | IL-21 | LPS | PMA / Ionomycin |
| Basophils                                          | -  | 1             | 1    | -    | 1     | 1     | -   | -               |
| CD4 <sup>+</sup> T                                 | 3  | -             | 1    | -    | -     | -     | -   | 2               |
| CD8 <sup>+</sup> T                                 | -  | -             | 3    | -    | -     | -     | -   | -               |
| CD4 <sup>-</sup> CD8 <sup>-</sup> T                | -  | -             | -    | -    | -     | -     | -   | -               |
| CD4 <sup>+</sup> CD8 <sup>+</sup> T                | 1  | -             | 1    | -    | -     | -     | -   | -               |
| NKT                                                | -  | -             | 1    | -    | -     | -     | -   | -               |
| B                                                  | 8  | 1             | 7    | 8    | -     | -     | 7   | 7               |
| NK                                                 | 4  | 1             | 4    | 4    | -     | 1     | 4   | 4               |
| DCs                                                | -  | -             | -    | -    | -     | -     | -   | -               |
| Monocytes                                          | -  | -             | -    | -    | -     | -     | -   | -               |
| <b>Signal: pSTAT3 (n=61, 36%)</b>                  |    |               |      |      |       |       |     |                 |
|                                                    | US | IFN- $\alpha$ | IL-6 | IL-7 | IL-10 | IL-21 | LPS | PMA / Ionomycin |
| Basophils                                          | -  | -             | -    | -    | -     | -     | -   | -               |
| CD4 <sup>+</sup> T                                 | 2  | -             | -    | 5    | -     | -     | 7   | 6               |
| CD8 <sup>+</sup> T                                 | -  | -             | 2    | -    | -     | -     | 1   | 1               |
| CD4 <sup>-</sup> CD8 <sup>-</sup> T                | -  | -             | -    | -    | -     | -     | -   | -               |
| CD4 <sup>+</sup> CD8 <sup>+</sup> T                | -  | -             | 1    | -    | -     | -     | -   | -               |
| NKT                                                | -  | -             | 1    | -    | -     | -     | -   | -               |
| B                                                  | 3  | 1             | 2    | 2    | -     | 5     | 8   | 8               |
| NK                                                 | 1  | -             | 1    | 1    | -     | -     | 1   | 1               |
| DCs                                                | -  | -             | -    | -    | -     | 1     | -   | -               |
| Monocytes                                          | -  | -             | -    | -    | -     | -     | -   | -               |
| <b>Signal: pPLC<math>\gamma</math>2 (n=14, 8%)</b> |    |               |      |      |       |       |     |                 |
|                                                    | US | IFN- $\alpha$ | IL-6 | IL-7 | IL-10 | IL-21 | LPS | PMA / Ionomycin |
| All                                                | 2  | 3             | 2    | 1    | 1     | 1     | 2   | 2               |
| <b>Signal: pSTAT5 (n=9, 5%)</b>                    |    |               |      |      |       |       |     |                 |



| <b>Cluster 22 (n=139)</b>           |    |               |      |      |       |       |     |                 |
|-------------------------------------|----|---------------|------|------|-------|-------|-----|-----------------|
| <b>Signal: pAKT (n=139, 100%)</b>   |    |               |      |      |       |       |     |                 |
|                                     | US | IFN- $\alpha$ | IL-6 | IL-7 | IL-10 | IL-21 | LPS | PMA / Ionomycin |
| Basophils                           | -  | -             | -    | -    | 1     | 1     | 1   | 1               |
| CD4 <sup>+</sup> T                  | -  | -             | -    | -    | 7     | 7     | 7   | 7               |
| CD8 <sup>+</sup> T                  | -  | -             | -    | -    | 6     | 6     | 6   | 6               |
| CD4 <sup>-</sup> CD8 <sup>-</sup> T | -  | -             | -    | -    | 1     | 1     | 1   | 1               |
| CD4 <sup>+</sup> CD8 <sup>+</sup> T | -  | -             | -    | -    | 1     | 1     | 1   | 1               |
| NKT                                 | -  | -             | -    | -    | 1     | 1     | 1   | 1               |
| B                                   | -  | -             | -    | -    | 8     | 8     | 8   | 7               |
| NK                                  | -  | -             | -    | -    | 4     | 4     | 4   | 4               |
| DCs                                 | -  | -             | -    | -    | 3     | 3     | 3   | 3               |
| Monocytes                           | -  | -             | -    | -    | 3     | 3     | 3   | 3               |
| <b>Cluster 23 (n=140)</b>           |    |               |      |      |       |       |     |                 |
| <b>Signal: EEA1 (n=140, 100%)</b>   |    |               |      |      |       |       |     |                 |
|                                     | US | IFN- $\alpha$ | IL-6 | IL-7 | IL-10 | IL-21 | LPS | PMA / Ionomycin |
| Basophils                           | -  | -             | -    | -    | 1     | 1     | 1   | 1               |
| CD4 <sup>+</sup> T                  | -  | -             | -    | -    | 7     | 7     | 7   | 7               |
| CD8 <sup>+</sup> T                  | -  | -             | -    | -    | 6     | 6     | 6   | 6               |
| CD4 <sup>-</sup> CD8 <sup>-</sup> T | -  | -             | -    | -    | 1     | 1     | 1   | 1               |
| CD4 <sup>+</sup> CD8 <sup>+</sup> T | -  | -             | -    | -    | 1     | 1     | 1   | 1               |
| NKT                                 | -  | -             | -    | -    | 1     | 1     | 1   | 1               |
| B                                   | -  | -             | -    | -    | 8     | 8     | 8   | 8               |
| NK                                  | -  | -             | -    | -    | 4     | 4     | 4   | 4               |
| DCs                                 | -  | -             | -    | -    | 3     | 3     | 3   | 3               |
| Monocytes                           | -  | -             | -    | -    | 3     | 3     | 3   | 3               |
| <b>Cluster 24 (n=275)</b>           |    |               |      |      |       |       |     |                 |
| <b>Signal: pSTAT5 (n=137, 50%)</b>  |    |               |      |      |       |       |     |                 |
|                                     | US | IFN- $\alpha$ | IL-6 | IL-7 | IL-10 | IL-21 | LPS | PMA / Ionomycin |
| Basophils                           | -  | -             | -    | -    | 1     | 1     | 1   | 1               |
| CD4 <sup>+</sup> T                  | -  | -             | -    | -    | 6     | 6     | 7   | 7               |
| CD8 <sup>+</sup> T                  | -  | -             | -    | -    | 6     | 6     | 6   | 6               |

|                                     |    |               |      |      |       |       |     |                 |
|-------------------------------------|----|---------------|------|------|-------|-------|-----|-----------------|
| CD4 <sup>+</sup> CD8 <sup>+</sup> T | -  | -             | -    | -    | 1     | 1     | 1   | 1               |
| CD4 <sup>+</sup> CD8 <sup>+</sup> T | -  | -             | -    | -    | 1     | 1     | 1   | 1               |
| NKT                                 | -  | -             | -    | -    | 1     | 1     | 1   | 1               |
| B                                   | -  | -             | -    | -    | 8     | 8     | 8   | 8               |
| NK                                  | -  | -             | -    | -    | 4     | 4     | 4   | 4               |
| DCs                                 | -  | -             | -    | -    | 2     | 3     | 3   | 3               |
| Monocytes                           | -  | -             | -    | -    | 3     | 3     | 3   | 3               |
| <b>Signal: p38 (n=95, 35%)</b>      |    |               |      |      |       |       |     |                 |
|                                     | US | IFN- $\alpha$ | IL-6 | IL-7 | IL-10 | IL-21 | LPS | PMA / Ionomycin |
| Basophils                           | -  | -             | -    | -    | 1     | 1     | 1   | -               |
| CD4 <sup>+</sup> T                  | -  | -             | -    | -    | 7     | 7     | 7   | -               |
| CD8 <sup>+</sup> T                  | -  | -             | -    | -    | 6     | 6     | 6   | -               |
| CD4 <sup>+</sup> CD8 <sup>+</sup> T | -  | -             | -    | -    | 1     | 1     | 1   | -               |
| CD4 <sup>+</sup> CD8 <sup>+</sup> T | -  | -             | -    | -    | 1     | 1     | 1   | -               |
| NKT                                 | -  | -             | -    | -    | 1     | 1     | 1   | -               |
| B                                   | -  | -             | -    | -    | 8     | 8     | 8   | -               |
| NK                                  | -  | -             | -    | -    | 4     | 4     | 4   | -               |
| DCs                                 | -  | -             | -    | -    | 2     | 2     | 2   | -               |
| Monocytes                           | -  | -             | -    | -    | 1     | 1     | -   | -               |
| <b>Signal: pSTAT3 (n=43, 16%)</b>   |    |               |      |      |       |       |     |                 |
|                                     | US | IFN- $\alpha$ | IL-6 | IL-7 | IL-10 | IL-21 | LPS | PMA / Ionomycin |
| Basophils                           | -  | -             | -    | -    | 1     | 1     | 1   | 1               |
| CD4 <sup>+</sup> T                  | -  | -             | -    | -    | -     | -     | -   | 1               |
| CD8 <sup>+</sup> T                  | -  | -             | -    | -    | -     | -     | 5   | 5               |
| CD4 <sup>+</sup> CD8 <sup>+</sup> T | -  | -             | -    | -    | -     | -     | 1   | 1               |
| CD4 <sup>+</sup> CD8 <sup>+</sup> T | -  | -             | -    | -    | -     | -     | 1   | 1               |
| NKT                                 | -  | -             | -    | -    | -     | -     | 1   | 1               |
| B                                   | -  | -             | -    | -    | -     | -     | -   | -               |
| NK                                  | -  | -             | -    | -    | -     | -     | 3   | 3               |
| DCs                                 | -  | -             | -    | -    | -     | 2     | 3   | 3               |
| Monocytes                           | -  | -             | -    | -    | -     | 2     | 3   | 3               |

**Table S2.** Demographics (age, sex, and number of *APOE*  $\epsilon$ 4 alleles) of participants in the discovery cohort by diagnostic group. Abbreviations: HC-I = Healthy Controls-I; AD = Alzheimer’s disease; PD = Parkinson’s disease; HC-II = Healthy Controls-II. Italicized HC-I samples are also HC-I<sub>sub</sub>.

| HC-I<br>(n=53) |          |                | AD<br>(n=28) |          |                | PD<br>(n=17) |          |                | HC-II<br>(n=10) |          |                |
|----------------|----------|----------------|--------------|----------|----------------|--------------|----------|----------------|-----------------|----------|----------------|
| Age            | Sex      | # $\epsilon$ 4 | Age          | Sex      | # $\epsilon$ 4 | Age          | Sex      | # $\epsilon$ 4 | Age             | Sex      | # $\epsilon$ 4 |
| <i>67</i>      | <i>F</i> | <i>0</i>       | <i>55</i>    | <i>F</i> | <i>1</i>       | <i>67</i>    | <i>F</i> | <i>1</i>       | <i>31</i>       | <i>F</i> | <i>NA</i>      |
| <i>67</i>      | <i>F</i> | <i>0</i>       | <i>57</i>    | <i>F</i> | <i>1</i>       | <i>67</i>    | <i>F</i> | <i>0</i>       | <i>33</i>       | <i>F</i> | <i>NA</i>      |
| <i>69</i>      | <i>F</i> | <i>0</i>       | <i>58</i>    | <i>F</i> | <i>NA</i>      | <i>71</i>    | <i>F</i> | <i>0</i>       | <i>36</i>       | <i>F</i> | <i>NA</i>      |
| <i>69</i>      | <i>F</i> | <i>0</i>       | <i>59</i>    | <i>F</i> | <i>0</i>       | <i>72</i>    | <i>F</i> | <i>0</i>       | <i>37</i>       | <i>F</i> | <i>NA</i>      |
| <i>70</i>      | <i>F</i> | <i>1</i>       | <i>61</i>    | <i>F</i> | <i>0</i>       | <i>74</i>    | <i>F</i> | <i>0</i>       | <i>42</i>       | <i>F</i> | <i>NA</i>      |
| <i>71</i>      | <i>F</i> | <i>0</i>       | <i>61</i>    | <i>F</i> | <i>NA</i>      | <i>75</i>    | <i>F</i> | <i>0</i>       | <i>58</i>       | <i>F</i> | <i>NA</i>      |
| <i>71</i>      | <i>F</i> | <i>1</i>       | <i>62</i>    | <i>F</i> | <i>1</i>       | <i>63</i>    | <i>M</i> | <i>0</i>       | <i>32</i>       | <i>M</i> | <i>NA</i>      |
| <i>71</i>      | <i>F</i> | <i>0</i>       | <i>64</i>    | <i>F</i> | <i>NA</i>      | <i>65</i>    | <i>M</i> | <i>1</i>       | <i>33</i>       | <i>M</i> | <i>NA</i>      |
| <i>72</i>      | <i>F</i> | <i>0</i>       | <i>70</i>    | <i>F</i> | <i>1</i>       | <i>67</i>    | <i>M</i> | <i>0</i>       | <i>45</i>       | <i>M</i> | <i>NA</i>      |
| <i>73</i>      | <i>F</i> | <i>0</i>       | <i>70</i>    | <i>F</i> | <i>1</i>       | <i>67</i>    | <i>M</i> | <i>1</i>       | <i>48</i>       | <i>M</i> | <i>NA</i>      |
| <i>73</i>      | <i>F</i> | <i>0</i>       | <i>71</i>    | <i>F</i> | <i>NA</i>      | <i>68</i>    | <i>M</i> | <i>0</i>       |                 |          |                |
| <i>73</i>      | <i>F</i> | <i>0</i>       | <i>76</i>    | <i>F</i> | <i>1</i>       | <i>68</i>    | <i>M</i> | <i>0</i>       |                 |          |                |
| <i>63</i>      | <i>M</i> | <i>NA</i>      | <i>83</i>    | <i>F</i> | <i>1</i>       | <i>70</i>    | <i>M</i> | <i>0</i>       |                 |          |                |
| <i>65</i>      | <i>M</i> | <i>0</i>       | <i>84</i>    | <i>F</i> | <i>1</i>       | <i>73</i>    | <i>M</i> | <i>0</i>       |                 |          |                |
| <i>67</i>      | <i>M</i> | <i>0</i>       | <i>60</i>    | <i>M</i> | <i>1</i>       | <i>75</i>    | <i>M</i> | <i>0</i>       |                 |          |                |
| <i>68</i>      | <i>M</i> | <i>0</i>       | <i>61</i>    | <i>M</i> | <i>0</i>       | <i>77</i>    | <i>M</i> | <i>0</i>       |                 |          |                |
| <i>68</i>      | <i>M</i> | <i>0</i>       | <i>62</i>    | <i>M</i> | <i>2</i>       | <i>78</i>    | <i>M</i> | <i>0</i>       |                 |          |                |

|    |   |    |    |   |    |
|----|---|----|----|---|----|
| 69 | M | 0  | 62 | M | 1  |
| 69 | M | NA | 69 | M | 0  |
| 70 | M | NA | 70 | M | 2  |
| 72 | M | 1  | 75 | M | NA |
| 72 | M | 0  | 78 | M | NA |
| 73 | M | 0  | 80 | M | 0  |
| 73 | M | 0  | 81 | M | NA |
| 74 | M | 0  | 83 | M | 1  |
| 74 | M | 0  | 83 | M | 1  |
| 75 | M | 0  | 83 | M | 0  |
| 76 | M | 0  | 87 | M | 0  |

|    |   |    |
|----|---|----|
| 78 | M | 1  |
| 78 | M | 1  |
| 78 | M | NA |
| 80 | M | 1  |
| 80 | M | 0  |
| 80 | M | 0  |
| 59 | F | NA |
| 59 | F | NA |
| 59 | F | NA |
| 61 | F | NA |
| 62 | F | 0  |
| 62 | F | NA |



|    |   |    |
|----|---|----|
| 63 | F | 0  |
| 64 | F | 1  |
| 66 | F | 0  |
| 76 | F | NA |
| 79 | F | 0  |
| 80 | F | 0  |
| 55 | M | NA |
| 81 | M | 0  |
| 82 | M | 2  |
| 83 | M | 0  |
| 84 | M | 0  |
| 87 | M | 1  |
| 94 | M | 0  |

**Table S3.** Demographics (age, sex, and number of *APOE*  $\epsilon$ 4 alleles) of participants in the validation cohort by diagnostic group. HC-V = Healthy controls validation; AD-V = Alzheimer’s disease validation.

| HC-V<br>(n=15) |     |                | AD-V<br>(n=9) |     |                |
|----------------|-----|----------------|---------------|-----|----------------|
| Age            | Sex | # $\epsilon$ 4 | Age           | Sex | # $\epsilon$ 4 |
| 62             | F   | NA             | 60            | F   | NA             |
| 63             | F   | NA             | 63            | F   | NA             |
| 67             | F   | 1              | 70            | F   | NA             |
| 67             | F   | NA             | 81            | F   | 0              |
| 70             | F   | 0              | 81            | F   | NA             |
| 70             | F   | 0              | 65            | M   | 0              |
| 73             | F   | NA             | 70            | M   | NA             |
| 78             | F   | 0              | 86            | M   | 0              |
| 80             | F   | 2              | 91            | M   | NA             |
| 61             | M   | 1              |               |     |                |
| 64             | M   | 0              |               |     |                |
| 66             | M   | 1              |               |     |                |
| 69             | M   | 2              |               |     |                |
| 77             | M   | 0              |               |     |                |
| 89             | M   | 0              |               |     |                |

**Table S4.** Target, clone, and conjugation information and product identifier.

| <b>Metal</b> | <b>Target</b>   | <b>Clone</b> | <b>Conjugation</b> | <b>Product identifier</b>   |
|--------------|-----------------|--------------|--------------------|-----------------------------|
| 113 In       | Rab5            | SC-28570     | In House           | Santa Cruz Cat # sc28570    |
| 115 In       | Lamp2           | H4B4         | In House           | Biolegend Cat# 354302       |
| 140 Ce       | Beads           | NA           | NA                 | Fluidigm Cat # 201078       |
| 142 Nd       | EEA1            | C45B10       | In House           | Cell signaling Cat # 3288BF |
| 143 Nd       | CD19            | HIB19        | In House           | Biolegend Cat # 302202      |
| 144 Nd       | pPLC $\gamma$ 2 | K86-689.37   | Fluidigm           | Fluidigm Cat # 3144015A     |
| 145 Nd       | CD4             | RPA-T4       | Fluidigm           | Fluidigm Cat # 3145001B     |
| 146 Nd       | IgD             | IA6-2        | Fluidigm           | Fluidigm Cat # 3146005B     |
| 147 Sm       | CD20            | H1           | In House           | BD Cat # 555677             |
| 148 Nd       | IgA             | Polyclonal   | Fluidigm           | Fluidigm Cat # 3148007B     |
| 149 Sm       | CD25            | 2A3          | Fluidigm           | Fluidigm Cat # 3149010B     |
| 150 Nd       | pSTAT5          | 47           | Fluidigm           | Fluidigm Cat # 3150005A     |
| 151 Eu       | CD123           | 6H6          | Fluidigm           | Fluidigm Cat # 3151001B     |
| 152 Sm       | pAKT            | D9E          | Fluidigm           | Fluidigm Cat # 3152005A     |
| 153 Eu       | pSTAT1          | 4a           | Fluidigm           | Fluidigm Cat # 3153005A     |
| 154 Sm       | CD27            | O323         | In house           | Biolegend Cat # 302802      |
| 156 Gd       | p38             | D3F9         | Fluidigm           | Fluidigm Cat # 3156002A     |
| 157 Gd       | CD24            | ML-5         | In House           | Biolegend Cat # 555246      |
| 158 Gd       | pSTAT3          | 4            | Fluidigm           | Fluidigm Cat # 3158005A     |
| 159 Tb       | CD11c           | Bu15         | Fluidigm           | Fluidigm Cat # 3159001B     |
| 160 Gd       | CD14            | M5E2         | Fluidigm           | Fluidigm Cat # 3160001B     |

|        |                       |            |          |                              |
|--------|-----------------------|------------|----------|------------------------------|
| 162 Dy | pLCK                  | 4/LCK-Y505 | Fluidigm | Fluidigm Cat # 3162004A      |
| 163 Dy | CD56                  | NCAM16.2   | Fluidigm | Fluidigm Cat # 3163007B      |
| 164 Dy | I $\kappa$ B $\alpha$ | L35A5      | Fluidigm | Fluidigm Cat # 3164004A      |
| 165 Ho | pCREB                 | 87G3       | Fluidigm | Fluidigm Cat # 3165009A      |
| 166 Er | CD16                  | B73.1      | In House | Ebioscience Cat # 16-0167-85 |
| 167 Er | CD38                  | HIT2       | Fluidigm | Fluidigm Cat # 3167001B      |
| 168 Er | CD8                   | SK1        | Fluidigm | Fluidigm Cat # 3168002B      |
| 169 Tm | CD45RA                | HI100      | Fluidigm | Fluidigm Cat # 3169008B      |
| 170 Er | CD3                   | UCHT1      | Fluidigm | Fluidigm Cat # 3170001B      |
| 171 Yb | pERK1/2               | D13.14.4E  | Fluidigm | Fluidigm Cat # 3171010A      |
| 172 Yb | NF- $\kappa$ B        | 4D1        | In House | Biolegend Cat # 616702       |
| 173 Yb | CD7                   | CD7-6B7    | in House | Biolegend Cat # 343102       |
| 174 Yb | HLA-DR                | L243       | Fluidigm | Fluidigm Cat # 3174001B      |
| 175 Lu | pS6                   | N7-548     | Fluidigm | Fluidigm Cat # 3175009A      |
| 176 Yb | CD127                 | AO19D5     | Fluidigm | Fluidigm Cat # 3176004B      |
| 209 Bi | CD11b                 | ICRF44     | Fluidigm | Fluidigm Cat # 3209003B      |

**Table S5.** Stimulants used to activate PBMCs.

| <b>Stimulation</b> | <b>Source</b>         | <b>Catalog #</b> | <b>Final Concentration</b> |
|--------------------|-----------------------|------------------|----------------------------|
| IFN- $\alpha$      | PBL Interferon Source | 11105-1          | 10,000 units/ml            |
| IL-6               | BD Biosciences        | 550071           | 50 ng/ml                   |
| IL-7               | BD Biosciences        | 554608           | 50 ng/ml                   |
| IL-10              | BD Biosciences        | 554611           | 50 ng/ml                   |
| IL-21              | Life Sciences, Gibco  | PHC0214          | 50 ng/ml                   |
| LPS                | Sigma-Aldrich         | L7770            | 1 $\mu$ g/ml               |
| PMA                | Sigma-Aldrich         | P8139            | 100 ng /ml                 |
| Ionomycin          | Calbiochem            | 407952           | 1000 ng/ml                 |

**Table S6.** Cell counts for each stimulating condition in each gated population. Data are aggregated over all 132 samples after collecting over 1.2 million events, removing unassigned events, and subsampling at a maximum of 100,000 per sample. Cell type hierarchy is shown in the gating strategy in Figs. S9 and S10. Non BT = non B and T cell populations. US = unstimulated.

| Cell Type                                  | US       | IFN- $\alpha$ | IL-6    | IL-7    | IL-10   | IL-21   | LPS     | PMA /<br>ionomycin |
|--------------------------------------------|----------|---------------|---------|---------|---------|---------|---------|--------------------|
| Total                                      | 10395247 | 9211105       | 9489772 | 9702098 | 9677665 | 9501021 | 9290856 | 6299873            |
| Basophils                                  | 66653    | 58688         | 56805   | 61943   | 57009   | 58859   | 59631   | 47100              |
| Non-Basophils                              | 10328219 | 9152166       | 9432369 | 9640722 | 9601849 | 9442604 | 9231008 | 6253340            |
| Lymphocytes                                | 9095101  | 8045968       | 8325915 | 8507811 | 8476132 | 8319355 | 8417538 | 5894545            |
| CD3 <sup>+</sup>                           | 5552179  | 5346089       | 5544292 | 5664958 | 5693952 | 5551715 | 5662085 | 3980790            |
| CD4 <sup>+</sup> T                         | 3627601  | 3605486       | 3714372 | 3799720 | 3837919 | 3735140 | 3790062 | 2737586            |
| CD4 <sup>+</sup> T <sub>Activated</sub>    | 126924   | 82531         | 96166   | 92021   | 82700   | 185979  | 160110  | 74966              |
| CD4 <sup>+</sup> T <sub>Central mem</sub>  | 1309750  | 1103655       | 1298995 | 967176  | 1297499 | 1322305 | 1297210 | 855152             |
| CD4 <sup>+</sup> T <sub>Effector</sub>     | 409931   | 566536        | 437759  | 768720  | 482418  | 423783  | 466230  | 390825             |
| CD4 <sup>+</sup> T <sub>Effector mem</sub> | 749178   | 986458        | 844018  | 1145457 | 852060  | 793195  | 852455  | 616625             |
| CD4 <sup>+</sup> T <sub>Naive</sub>        | 1179982  | 948837        | 1133600 | 870036  | 1205942 | 1195857 | 1174167 | 874984             |
| Tregs                                      | 131887   | 171258        | 146641  | 190470  | 103427  | 114381  | 140269  | 90748              |
| CD4 <sup>+</sup> CD8 <sup>+</sup> T        | 35710    | 29399         | 24980   | 27205   | 40345   | 33213   | 30300   | 19139              |
| CD4 <sup>+</sup> CD8 <sup>-</sup> T        | 464100   | 339988        | 463239  | 424230  | 371336  | 386132  | 416981  | 312066             |
| CD8 <sup>+</sup> T                         | 1388762  | 1350354       | 1392099 | 1426058 | 1427799 | 1398490 | 1413784 | 922034             |
| CD8 <sup>+</sup> T <sub>Activated</sub>    | 64575    | 43528         | 45927   | 49380   | 60235   | 66249   | 71182   | 38411              |
| CD8 <sup>+</sup> T <sub>Central mem</sub>  | 345435   | 318163        | 338020  | 260518  | 401047  | 346902  | 337211  | 193823             |
| CD8 <sup>+</sup> T <sub>Effector</sub>     | 335817   | 304559        | 335531  | 350787  | 267044  | 327134  | 313318  | 247808             |
| CD8 <sup>+</sup> T <sub>Effector mem</sub> | 300537   | 436033        | 304434  | 560383  | 434606  | 303298  | 352605  | 206625             |
| CD8 <sup>+</sup> T <sub>Naive</sub>        | 406973   | 291599        | 414114  | 254370  | 325102  | 421156  | 410650  | 273778             |
| NKT                                        | 552568   | 644955        | 858632  | 1570626 | 320470  | 480082  | 458057  | 302114             |

|                                            |         |         |         |         |         |         |         |         |
|--------------------------------------------|---------|---------|---------|---------|---------|---------|---------|---------|
| CD3 <sup>-</sup>                           | 2878194 | 2276246 | 2327506 | 2574372 | 2583485 | 2514451 | 2531164 | 1751016 |
| B                                          | 676242  | 781732  | 758498  | 675728  | 690728  | 680787  | 708495  | 487435  |
| IgA <sup>+</sup> B                         | 40532   | 37705   | 36804   | 37600   | 32385   | 39269   | 39834   | 25222   |
| IgD <sup>+</sup> B <sub>mem</sub>          | 185183  | 167942  | 167799  | 201120  | 175032  | 195696  | 188687  | 131176  |
| IgD <sup>-</sup> CD27 <sup>-</sup> B       | 132963  | 112299  | 121480  | 114681  | 140874  | 119299  | 131640  | 90951   |
| B <sub>Naive</sub>                         | 248728  | 288504  | 242719  | 279299  | 282697  | 281380  | 301257  | 209709  |
| Plasmablast                                | 30653   | 13553   | 68474   | 15791   | 29412   | 31762   | 31750   | 15845   |
| B <sub>Switched mem</sub>                  | 109368  | 69480   | 82993   | 80628   | 92125   | 84412   | 86911   | 55599   |
| B <sub>Transitional</sub>                  | 40882   | 40740   | 86892   | 49629   | 33890   | 38326   | 40368   | 40883   |
| CD3 <sup>-</sup> , Non BT                  | 2196571 | 1777051 | 1843924 | 1888413 | 1885181 | 1825506 | 1815090 | 1258690 |
| NK                                         | 1132857 | 1015775 | 1029519 | 1049397 | 1065365 | 1025886 | 1068659 | 771655  |
| CD16 <sup>high</sup> NK                    | 720283  | 614177  | 709463  | 713457  | 740438  | 720555  | 729661  | 409562  |
| CD56 <sup>bright</sup> NK                  | 129606  | 150824  | 97999   | 96871   | 89095   | 90876   | 89071   | 61607   |
| CD56 <sup>dim</sup> CD16 <sup>dim</sup> NK | 242878  | 236543  | 190472  | 229071  | 223467  | 200150  | 225960  | 281472  |
| DCs                                        | 1019121 | 749922  | 783600  | 813479  | 796195  | 774080  | 725795  | 471444  |
| mDCs                                       | 470477  | 398511  | 408850  | 437272  | 434655  | 441499  | 399322  | 247880  |
| pDCs                                       | 31464   | 30669   | 30579   | 32575   | 34276   | 33665   | 32537   | 17384   |
| Mono                                       | 1225245 | 1098538 | 1100431 | 1123949 | 1118209 | 1115297 | 806898  | 354578  |
| CD16 <sup>high</sup> Mono                  | 214399  | 172410  | 117624  | 87052   | 139313  | 237922  | 87240   | 73242   |
| CD16 <sup>low</sup> Mono                   | 1003228 | 919005  | 977516  | 1032601 | 967969  | 867290  | 715020  | 283842  |







|                                            |       |      |      |        |        |        |        |      |     |      |      |       |         |      |     |
|--------------------------------------------|-------|------|------|--------|--------|--------|--------|------|-----|------|------|-------|---------|------|-----|
| CD56 <sup>high</sup> NK                    | 0     | 0    | 0    | 1      | 1      | 1      | 0      | 0    | 0   | 0    | 0    | 0     | 0       | 0    | 0   |
| CD56 <sup>dim</sup> CD16 <sup>dim</sup> NK | 0     | 0    | 0    | 1      | 1      | 1      | 0      | 0    | 0   | 0    | 0    | 0     | 0       | 0    | 0   |
| NKT                                        | 0     | 0    | 0    | 1      | 1      | 1      | 0      | 0    | 0   | 0    | 0    | 0     | 0       | 0    | 0   |
| Mono                                       | 0     | 0    | 0    | 1      | 1      | 1      | 0      | 0    | 0   | 0    | 0    | 0     | 0       | 0    | 0   |
| CD16 <sup>low</sup> Mono                   | 0     | 0    | 0    | 1      | 1      | 1      | 0      | 0    | 0   | 0    | 0    | 0     | 0       | 0    | 0   |
| CD16 <sup>high</sup> Mono                  | 0     | 0    | 0    | 1      | 1      | 1      | 0      | 0    | 0   | 0    | 0    | 0     | 0       | 0    | 0   |
| Cell Type (IL-6)                           | Lamp2 | Rab5 | EEA1 | pSTAT1 | pSTAT3 | pSTAT5 | pPLCγ2 | pAKT | p38 | pLCK | Ikba | pCREB | pERK1/2 | NFκB | pS6 |
| Basophils                                  | 0     | 0    | 0    | 1      | 1      | 1      | 0      | 0    | 0   | 0    | 0    | 0     | 1       | 0    | 0   |
| CD4 <sup>+</sup> T                         | 0     | 0    | 0    | 1      | 1      | 1      | 0      | 0    | 0   | 0    | 0    | 0     | 1       | 0    | 0   |
| CD4 <sup>+</sup> T Activated               | 0     | 0    | 0    | 1      | 1      | 1      | 0      | 0    | 0   | 0    | 0    | 0     | 1       | 0    | 0   |
| CD4 <sup>+</sup> T Central mem             | 0     | 0    | 0    | 1      | 1      | 1      | 0      | 0    | 0   | 0    | 0    | 0     | 1       | 0    | 0   |
| CD4 <sup>+</sup> T Effector                | 0     | 0    | 0    | 1      | 1      | 1      | 0      | 0    | 0   | 0    | 0    | 0     | 1       | 0    | 0   |
| CD4 <sup>+</sup> T Effector mem            | 0     | 0    | 0    | 1      | 1      | 1      | 0      | 0    | 0   | 0    | 0    | 0     | 1       | 0    | 0   |
| CD4 <sup>+</sup> T Naive                   | 0     | 0    | 0    | 1      | 1      | 1      | 0      | 0    | 0   | 0    | 0    | 0     | 1       | 0    | 0   |
| Tregs                                      | 0     | 0    | 0    | 1      | 1      | 1      | 0      | 0    | 0   | 0    | 0    | 0     | 1       | 0    | 0   |
| CD8 <sup>+</sup> T                         | 0     | 0    | 0    | 1      | 1      | 1      | 0      | 0    | 0   | 0    | 0    | 0     | 1       | 0    | 0   |
| CD8 <sup>+</sup> T Activated               | 0     | 0    | 0    | 1      | 1      | 1      | 0      | 0    | 0   | 0    | 0    | 0     | 1       | 0    | 0   |
| CD8 <sup>+</sup> T Central mem             | 0     | 0    | 0    | 1      | 1      | 1      | 0      | 0    | 0   | 0    | 0    | 0     | 1       | 0    | 0   |
| CD8 <sup>+</sup> T Effector                | 0     | 0    | 0    | 1      | 1      | 1      | 0      | 0    | 0   | 0    | 0    | 0     | 1       | 0    | 0   |
| CD8 <sup>+</sup> T Effector mem            | 0     | 0    | 0    | 1      | 1      | 1      | 0      | 0    | 0   | 0    | 0    | 0     | 1       | 0    | 0   |
| CD8 <sup>+</sup> T Naive                   | 0     | 0    | 0    | 1      | 1      | 1      | 0      | 0    | 0   | 0    | 0    | 0     | 1       | 0    | 0   |
| B                                          | 0     | 0    | 0    | 1      | 1      | 1      | 0      | 0    | 0   | 0    | 0    | 0     | 1       | 0    | 0   |
| IgA <sup>+</sup> B                         | 0     | 0    | 0    | 1      | 1      | 1      | 0      | 0    | 0   | 0    | 0    | 0     | 1       | 0    | 0   |
| IgD <sup>+</sup> Bmem                      | 0     | 0    | 0    | 1      | 1      | 1      | 0      | 0    | 0   | 0    | 0    | 0     | 1       | 0    | 0   |
| IgD <sup>+</sup> CD27 <sup>+</sup> B       | 0     | 0    | 0    | 1      | 1      | 1      | 0      | 0    | 0   | 0    | 0    | 0     | 1       | 0    | 0   |
| B Naive                                    | 0     | 0    | 0    | 1      | 1      | 1      | 0      | 0    | 0   | 0    | 0    | 0     | 1       | 0    | 0   |
| Plasmablast                                | 0     | 0    | 0    | 1      | 1      | 1      | 0      | 0    | 0   | 0    | 0    | 0     | 1       | 0    | 0   |
| B Switched mem                             | 0     | 0    | 0    | 1      | 1      | 1      | 0      | 0    | 0   | 0    | 0    | 0     | 1       | 0    | 0   |
| B Transitional                             | 0     | 0    | 0    | 1      | 1      | 1      | 0      | 0    | 0   | 0    | 0    | 0     | 1       | 0    | 0   |
| DCs                                        | 0     | 0    | 0    | 1      | 1      | 1      | 0      | 0    | 0   | 0    | 0    | 0     | 1       | 0    | 0   |
| mDCs                                       | 0     | 0    | 0    | 1      | 1      | 1      | 0      | 0    | 0   | 0    | 0    | 0     | 1       | 0    | 0   |
| pDCs                                       | 0     | 0    | 0    | 1      | 1      | 1      | 0      | 0    | 0   | 0    | 0    | 0     | 1       | 0    | 0   |















## REFERENCES AND NOTES

1. O. Butovsky, M. Koronyo-Hamaoui, G. Kunis, E. Ophir, G. Landa, H. Cohen, M. Schwartz, Glatiramer acetate fights against Alzheimer's disease by inducing dendritic-like microglia expressing insulin-like growth factor 1. *Proc. Natl. Acad. Sci. U.S.A.* **103**, 11784–11789 (2006).
2. M. Fiala, Q. N. Liu, J. Sayre, V. Pop, V. Brahmandam, M. C. Graves, H. V. Vinters, Cyclooxygenase-2-positive macrophages infiltrate the Alzheimer's disease brain and damage the blood-brain barrier. *Eur. J. Clin. Invest.* **32**, 360–371 (2002).
3. T. J. Lewis, C. L. Trempe, *The End of Alzheimer's: The Brain and Beyond* (Academic Press, 2017).
4. R. Perneczky, *Biomarkers for Alzheimer's Disease Drug Development* (Humana Press, 2018).
5. K. Rezai-Zadeh, D. Gate, C. A. Szekely, T. Town, Can peripheral leukocytes be used as Alzheimer's disease biomarkers? *Expert Rev. Neurother.* **9**, 1623–1633 (2009).
6. T. Raj, K. Rothamel, S. Mostafavi, C. Ye, M. N. Lee, J. M. Replogle, T. Feng, M. Lee, N. Asinovski, I. Frohlich, S. Imboywa, A. Von Korff, Y. Okada, N. A. Patsopoulos, S. Davis, C. McCabe, H.-I. Paik, G. P. Srivastava, S. Raychaudhuri, D. A. Hafler, D. Koller, A. Regev, N. Hacohen, D. Mathis, C. Benoist, B. E. Stranger, P. L. De Jager, Polarization of the effects of autoimmune and neurodegenerative risk alleles in leukocytes. *Science* **344**, 519–523 (2014).
7. K. J. Ryan, C. C. White, K. Patel, J. Xu, M. Olah, J. M. Replogle, M. Frangieh, M. Cimpean, P. Winn, A. McHenry, B. J. Kaskow, G. Chan, N. Cuerdon, D. A. Bennett, J. D. Boyd, J. Imitola, W. Elyaman, P. L. De Jager, E. M. Bradshaw, A human microglia-like cellular model for assessing the effects of neurodegenerative disease gene variants. *Sci. Transl. Med.* **9**, eaai7635 (2017).
8. E. Delvaux, D. Mastroeni, J. Nolz, N. Chow, M. Sabbagh, R. J. Caselli, E. M. Reiman, F. J. Marshall, P. D. Coleman, Multivariate analyses of peripheral blood leukocyte transcripts distinguish Alzheimer's, Parkinson's, control, and those at risk for developing Alzheimer's. *Neurobiol. Aging* **58**, 225–237 (2017).

9. G. Schmidbauer, W. W. Hancock, B. Wasowska, A. M. Badger, J. W. Kupiec-Weglinski, Abrogation by rapamycin of accelerated rejection in sensitized rats by inhibition of alloantibody responses and selective suppression of intragraft mononuclear and endothelial cell activation, cytokine production, and cell adhesion. *Transplantation* **57**, 933–941 (1994).
10. R. Davies, P. Vogelsang, R. Jonsson, S. Appel, An optimized multiplex flow cytometry protocol for the analysis of intracellular signaling in peripheral blood mononuclear cells. *J. Immunol. Methods* **436**, 58–63 (2016).
11. S. Ray, M. Britschgi, C. Herbert, Y. Takeda-Uchimura, A. Boxer, K. Blennow, L. F. Friedman, D. R. Galasko, M. Jutel, A. Karydas, J. A. Kaye, J. Leszek, B. L. Miller, L. Minthon, J. F. Quinn, G. D. Rabinovici, W. H. Robinson, M. N. Sabbagh, Y. T. So, D. L. Sparks, M. Tabaton, J. Tinklenberg, J. A. Yesavage, R. Tibshirani, T. Wyss-Coray, Classification and prediction of clinical Alzheimer's diagnosis based on plasma signaling proteins. *Nat. Med.* **13**, 1359–1362 (2007).
12. H. D. Soares, Y. Chen, M. Sabbagh, A. Rohrer, E. Schrijvers, M. Breteler, Identifying early markers of Alzheimer's disease using quantitative multiplex proteomic immunoassay panels. *Ann. N. Y. Acad. Sci.* **1180**, 56–67 (2009).
13. A. Cosma, G. Nolan, B. Gaudilliere, Mass cytometry: The time to settle down. *Cytometry A* **91**, 12–13 (2017).
14. Q. Baca, A. Cosma, G. Nolan, B. Gaudilliere, The road ahead: Implementing mass cytometry in clinical studies, one cell at a time. *Cytometry B Clin. Cytom.* **92**, 10–11 (2017).
15. P. Kvistborg, C. Gouttefangeas, N. Aghaeepour, A. Cazaly, P. K. Chattopadhyay, C. Chan, J. Eckl, G. Finak, S. R. Hadrup, H. T. Maecker, D. Maurer, T. Mosmann, P. Qiu, R. H. Scheuermann, M. J. P. Welters, G. Ferrari, R. R. Brinkman, C. M. Britten, Thinking outside the gate: Single-cell assessments in multiple dimensions. *Immunity* **42**, 591–592 (2015).
16. S. C. Bendall, G. P. Nolan, M. Roederer, P. K. Chattopadhyay, A deep profiler's guide to cytometry. *Trends Immunol.* **33**, 323–332 (2012).

17. N. Aghaeepour, P. Chattopadhyay, M. Chikina, T. Dhaene, S. Van Gassen, M. Kursa, B. N. Lambrecht, M. Malek, G. J. McLachlan, Y. Qian, P. Qiu, Y. Saeys, R. Stanton, D. Tong, C. Vens, S. Walkowiak, K. Wang, G. Finak, R. Gottardo, T. Mosmann, G. P. Nolan, R. H. Scheuermann, R. R. Brinkman, A benchmark for evaluation of algorithms for identification of cellular correlates of clinical outcomes. *Cytometry A* **89**, 16–21 (2016).
18. N. Stanley, I. Stelzer, R. Fallahzadeh, E. Ganio, A. Tsai, M. Becker, T. Phongpreecha, H. Nassar, S. Ghaemi, A. Culos, X. Han, K. Rumer, L. Peterson, A. Chang, I. Maric, D. Gaudilliere, E. Tsai, K. Ando, M. Leipold, G. Bermoser, D. Cross, A. Pollard, H. Maecker, G. Shaw, D. Stevenson, M. Angst, B. Gaudilliere, N. Aghaeepour, VoPo leverages cellular heterogeneity for predictive modeling of single-cell data. *Nat. Commun.* **11**, 3738 (2020).
19. V. G. Tusher, R. Tibshirani, G. Chu, Significance analysis of microarrays applied to the ionizing radiation response. *Proc. Natl. Acad. Sci. U.S.A.* **98**, 5116–5121 (2001).
20. A. E. Culos, A. S. Tsai, N. Stanley, M. Becker, M. S. Ghaemi, D. R. Mcilwain, R. Fallahzadeh, A. Tanada, H. Nassar, E. Ganio, L. Peterson, X. Han, I. Stelzer, K. Ando, D. Gaudilliere, T. Phongpreecha, I. Marić, A. L. Chang, G. M. Shaw, D. K. Stevenson, S. Bendall, K. L. Davis, W. Fantl, G. P. Nolan, T. Hastie, R. Tibshirani, M. S. Angst, B. Gaudilliere, N. Aghaeepour, Integration of mechanistic immunological knowledge into a machine learning pipeline improves predictions. *Nat. Mach. Intell.* **2**, 619–628 (2020).
21. R. Sims, S. J. van der Lee, A. C. Naj, C. Bellenguez, N. Badarinarayan, J. Jakobsdottir, B. W. Kunkle, A. Boland, R. Raybould, J. C. Bis, E. R. Martin, B. Grenier-Boley, S. Heilmann-Heimbach, V. Chouraki, A. B. Kuzma, K. Sleegers, M. Vronskaya, A. Ruiz, R. R. Graham, R. Olaso, P. Hoffmann, M. L. Grove, B. N. Vardarajan, M. Hiltunen, M. M. Nöthen, C. C. White, K. L. Hamilton-Nelson, J. Epelbaum, W. Maier, S.-H. Choi, G. W. Beecham, C. Dulary, S. Herms, A. V. Smith, C. C. Funk, C. Derbois, A. J. Forstner, S. Ahmad, H. Li, D. Bacq, D. Harold, C. L. Satizabal, O. Valladares, A. Squassina, R. Thomas, J. A. Brody, L. Qu, P. Sánchez-Juan, T. Morgan, F. J. Wolters, Y. Zhao, F. S. Garcia, N. Denning, M. Fornage, J. Malamon, M. C. D. Naranjo, E. Majounie, T. H. Mosley, B. Dombroski, D. Wallon, M. K. Lupton, J. Dupuis, P. Whitehead, L. Fratiglioni, C. Medway, X. Jian, S. Mukherjee, L. Keller, K. Brown, H. Lin, L. B. Cantwell, F.

Panza, B. McGuinness, S. Moreno-Grau, J. D. Burgess, V. Solfrizzi, P. Proitsi, H. H. Adams, M. Allen, D. Seripa, P. Pastor, L. A. Cupples, N. D. Price, D. Hannequin, A. Frank-García, D. Levy, P. Chakrabarty, P. Caffarra, I. Giegling, A. S. Beiser, V. Giedraitis, H. Hampel, M. E. Garcia, X. Wang, L. Lannfelt, P. Mecocci, G. Eiriksdottir, P. K. Crane, F. Pasquier, V. Boccardi, I. Henández, R. C. Barber, M. Scherer, L. Tarraga, P. M. Adams, M. Leber, Y. Chen, M. S. Albert, S. Riedel-Heller, V. Emilsson, D. Beekly, A. Braae, R. Schmidt, D. Blacker, C. Masullo, H. Schmidt, R. S. Doody, G. Spalletta, W. T. Longstreth Jr., T. J. Fairchild, P. Bossù, O. L. Lopez, M. P. Frosch, E. Sacchinelli, B. Ghetti, Q. Yang, R. M. Huebinger, F. Jessen, S. Li, M. I. Kamboh, J. Morris, O. Sotolongo-Grau, M. J. Katz, C. Corcoran, M. Dunstan, A. Braddel, C. Thomas, A. Meggy, R. Marshall, A. Gerrish, J. Chapman, M. Aguilar, S. Taylor, M. Hill, M. D. Fairén, A. Hodges, B. Vellas, H. Soininen, I. Kloszewska, M. Daniilidou, J. Uphill, Y. Patel, J. T. Hughes, J. Lord, J. Turton, A. M. Hartmann, R. Cecchetti, C. Fenoglio, M. Serpente, M. Arcaro, C. Caltagirone, M. D. Orfei, A. Ciaramella, S. Pichler, M. Mayhaus, W. Gu, A. Lleó, J. Fortea, R. Blesa, I. S. Barber, K. Brookes, C. Cupidi, R. G. Maletta, D. Carrell, S. Sorbi, S. Moebus, M. Urbano, A. Pilotto, J. Kornhuber, P. Bosco, S. Todd, D. Craig, J. Johnston, M. Gill, B. Lawlor, A. Lynch, N. C. Fox, J. Hardy, ARUK Consortium, R. L. Albin, L. G. Apostolova, S. E. Arnold, S. Asthana, C. S. Atwood, C. T. Baldwin, L. L. Barnes, S. Barral, T. G. Beach, J. T. Becker, E. H. Bigio, T. D. Bird, B. F. Boeve, J. D. Bowen, A. Boxer, J. R. Burke, J. M. Burns, J. D. Buxbaum, N. J. Cairns, C. Cao, C. S. Carlson, C. M. Carlsson, R. M. Carney, M. M. Carrasquillo, S. L. Carroll, C. C. Diaz, H. C. Chui, D. G. Clark, D. H. Cribbs, E. A. Crocco, C. DeCarli, M. Dick, R. Duara, D. A. Evans, K. M. Faber, K. B. Fallon, D. W. Fardo, M. R. Farlow, S. Ferris, T. M. Foroud, D. R. Galasko, M. Gearing, D. H. Geschwind, J. R. Gilbert, N. R. Graff-Radford, R. C. Green, J. H. Growdon, R. L. Hamilton, L. E. Harrell, L. S. Honig, M. J. Huentelman, C. M. Hulette, B. T. Hyman, G. P. Jarvik, E. Abner, L.-W. Jin, G. Jun, A. Karydas, J. A. Kaye, R. Kim, N. W. Kowall, J. H. Kramer, F. M. LaFerla, J. J. Lah, J. B. Leverenz, A. I. Levey, G. Li, A. P. Lieberman, K. L. Lunetta, C. G. Lyketsos, D. C. Marson, F. Martiniuk, D. C. Mash, E. Masliah, W. C. McCormick, S. M. McCurry, A. N. McDavid, A. C. McKee, M. Mesulam, B. L. Miller, C. A. Miller, J. W. Miller, J. C. Morris, J. R. Murrell, A. J. Myers, S. O'Bryant, J. M. Olichney, V. S. Pankratz, J. E. Parisi, H. L. Paulson, W. Perry, E. Peskind, A. Pierce, W. W. Poon, H. Potter, J. F. Quinn, A. Raj, M. Raskind, B. Reisberg, C. Reitz, J. M. Ringman, E. D. Roberson, E. Rogaeva, H. J. Rosen, R. N. Rosenberg, M. A. Sager, A. J. Saykin, J. A. Schneider, L. S. Schneider, W. W. Seeley, A. G. Smith, J. A. Sonnen, S. Spina, R. A. Stern, R.

H. Swerdlow, R. E. Tanzi, T. A. Thornton-Wells, J. Q. Trojanowski, J. C. Troncoso, V. M. Van Deerlin, L. J. Van Eldik, H. V. Vinters, J. P. Vonsattel, S. Weintraub, K. A. Welsh-Bohmer, K. C. Wilhelmsen, J. Williamson, T. S. Wingo, R. L. Woltjer, C. B. Wright, C.-E. Yu, L. Yu, F. Garzia, F. Golamaully, G. Septier, S. Engelborghs, R. Vandenberghe, P. P. De Deyn, C. M. Fernandez, Y. A. Benito, H. Thonberg, C. Forsell, L. Lilius, A. Kinhult-Stählbom, L. Kilander, R. Brundin, L. Concari, S. Helisalimi, A. M. Koivisto, A. Haapasalo, V. Dermecourt, N. Fievet, O. Hanon, C. Dufouil, A. Brice, K. Ritchie, B. Dubois, J. J. Himali, C. D. Keene, J. Tschanz, A. L. Fitzpatrick, W. A. Kukull, M. Norton, T. Aspelund, E. B. Larson, R. Munger, J. I. Rotter, R. B. Lipton, M. J. Bullido, A. Hofman, T. J. Montine, E. Coto, E. Boerwinkle, R. C. Petersen, V. Alvarez, F. Rivadeneira, E. M. Reiman, M. Gallo, C. J. O'Donnell, J. S. Reisch, A. C. Bruni, D. R. Royall, M. Dichgans, M. Sano, D. Galimberti, P. St George-Hyslop, E. Scarpini, D. W. Tsuang, M. Mancuso, U. Bonuccelli, A. R. Winslow, A. Daniele, C.-K. Wu; GERAD/PERADES, CHARGE, ADGC, EADI, O. Peters, B. Nacmias, M. Riemenschneider, R. Heun, C. Brayne, D. C. Rubinsztein, J. Bras, R. Guerreiro, A. Al-Chalabi, C. E. Shaw, J. Collinge, D. Mann, M. Tsolaki, J. Clarimón, R. Sussams, S. Lovestone, M. C. O'Donovan, M. J. Owen, T. W. Behrens, S. Mead, A. M. Goate, A. G. Uitterlinden, C. Holmes, C. Cruchaga, M. Ingelsson, D. A. Bennett, J. Powell, T. E. Golde, C. Graff, P. L. De Jager, K. Morgan, N. Ertekin-Taner, O. Combarros, B. M. Psaty, P. Passmore, S. G. Younkin, C. Berr, V. Gudnason, D. Rujescu, D. W. Dickson, J.-F. Dartigues, A. L. DeStefano, S. Ortega-Cubero, H. Hakonarson, D. Champion, M. Boada, J. K. Kauwe, L. A. Farrer, C. Van Broeckhoven, M. A. Ikram, L. Jones, J. L. Haines, C. Tzourio, L. J. Launer, V. Escott-Price, R. Mayeux, J.-F. Deleuze, N. Amin, P. A. Holmans, M. A. Pericak-Vance, P. Amouyel, C. M. van Duijn, A. Ramirez, L.-S. Wang, J.-C. Lambert, S. Seshadri, J. Williams, G. D. Schellenberg, Rare coding variants in *PLCG2*, *ABI3*, and *TREM2* implicate microglial-mediated innate immunity in Alzheimer's disease. *Nat. Genet.* **49**, 1373–1384 (2017).

22. C. Le Saout, M. A. Luckey, A. V. Villarino, M. Smith, R. B. Hasley, T. G. Myers, H. Imamichi, J.-H. Park, J. J. O'Shea, H. C. Lane, M. Catalfamo, IL-7-dependent STAT1 activation limits homeostatic CD4<sup>+</sup> T cell expansion. *JCI Insight* **2**, e96228 (2017).
23. G. K. Fragiadakis, Z. B. Bjornson-Hooper, D. Madhiredy, K. Sachs, M. H. Spitzer, S. C. Bendall, G. P. Nolan, Variation of immune cell responses in humans reveals sex-specific coordinated signaling across cell types. *bioRxiv*, 567784 (2019).

24. J. R. Lynch, W. Tang, H. Wang, M. P. Vitek, E. R. Bennett, P. M. Sullivan, D. S. Warner, D. T. Laskowitz, APOE genotype and an ApoE-mimetic peptide modify the systemic and central nervous system inflammatory response. *J. Biol. Chem.* **278**, 48529–48533 (2003).
25. M. P. Vitek, C. M. Brown, C. A. Colton, APOE genotype-specific differences in the innate immune response. *Neurobiol. Aging* **30**, 1350–1360 (2009).
26. R. W. Mahley, S. C. Rall Jr., Apolipoprotein E: Far more than a lipid transport protein. *Annu. Rev. Genomics Hum. Genet.* **1**, 507–537 (2000).
27. P. Olgiati, A. Politis, P. Malitas, D. Albani, S. Dusi, L. Polito, S. De Mauro, A. Zisaki, C. Piperi, E. Stamouli, A. Mailis, S. Batelli, G. Forloni, D. De Ronchi, A. Kalofoutis, I. Liappas, A. Serretti, APOE epsilon-4 allele and cytokine production in Alzheimer's disease. *Int. J. Geriatr. Psychiatry* **25**, 338–344 (2010).
28. D. Gate, N. Saligrama, O. Leventhal, A. C. Yang, M. S. Unger, J. Middeldorp, K. Chen, B. Lehallier, D. Channappa, M. B. De Los Santos, A. McBride, J. Pluvinage, F. Elahi, G. K.-Y. Tam, Y. Kim, M. Greicius, A. D. Wagner, L. Aigner, D. R. Galasko, M. M. Davis, T. Wyss-Coray, Clonally expanded CD8 T cells patrol the cerebrospinal fluid in Alzheimer's disease. *Nature* **577**, 399–404 (2020).
29. C. R. Stewart, L. M. Stuart, K. Wilkinson, J. M. van Gils, J. Deng, A. Halle, K. J. Rayner, L. Boyer, R. Zhong, W. A. Frazier, A. Lacy-Hulbert, J. El Khoury, D. T. Golenbock, K. J. Moore, CD36 ligands promote sterile inflammation through assembly of a Toll-like receptor 4 and 6 heterodimer. *Nat. Immunol.* **11**, 155–161 (2010).
30. K. Fujita, K. Motoki, K. Tagawa, X. Chen, H. Hama, K. Nakajima, H. Homma, T. Tamura, H. Watanabe, M. Katsuno, C. Matsumi, M. Kajikawa, T. Saito, T. Saido, G. Sobue, A. Miyawaki, H. Okazawa, HMGB1, a pathogenic molecule that induces neurite degeneration via TLR4-MARCKS, is a potential therapeutic target for Alzheimer's disease. *Sci. Rep.* **6**, 31895 (2016).

31. Y. Kitamura, S. Shimohama, T. Ota, Y. Matsuoka, Y. Nomura, T. Taniguchi, Alteration of transcription factors NF- $\kappa$ B and STAT1 in Alzheimer's disease brains. *Neurosci. Lett.* **237**, 17–20 (1997).
32. W. J. Lee, S. A. Ham, G. H. Lee, M. Choi, H. Yoo, K. S. Paek, D. Lim, K. Hong, J. S. Hwang, H. G. Seo, Activation of peroxisome proliferator-activated receptor delta suppresses BACE 1 expression by up-regulating SOCS 1 in a JAK2/ STAT1-dependent manner. *J. Neurochem.* **151**, 370–385 (2019).
33. G. Di Liberto, S. Pantelyushin, M. Kreutzfeldt, N. Page, S. Musardo, R. Coras, K. Steinbach, I. Vincenti, B. Klimek, T. Lingner, G. Salinas, N. Lin-Marq, O. Staszewski, M. J. Costa Jordão, I. Wagner, K. Egervari, M. Mack, C. Bellone, I. Blümcke, M. Prinz, D. D. Pinschewer, D. Merkler, Neurons under T cell attack coordinate phagocyte-mediated synaptic stripping. *Cell* **175**, 458–471.e19 (2018).
34. A. J. Nevado-Holgado, E. Ribe, L. Thei, L. Furlong, M.-A. Mayer, J. Quan, J. C. Richardson, J. Cavanagh, N. Consortium, S. Lovestone, Genetic and real-world clinical data, combined with empirical validation, nominate JAK-STAT signaling as a target for Alzheimer's disease therapeutic development. *Cell* **8**, 425 (2019).
35. O. J. Conway, M. M. Carrasquillo, X. Wang, J. M. Bredenberg, J. S. Reddy, S. L. Strickland, C. S. Younkin, J. D. Burgess, M. Allen, S. J. Lincoln, T. Nguyen, K. G. Malphrus, A. I. Soto, R. L. Walton, B. F. Boeve, R. C. Petersen, J. A. Lucas, T. J. Ferman, W. P. Cheshire, J. A. van Gerpen, R. J. Uitti, Z. K. Wszolek, O. A. Ross, D. W. Dickson, N. R. Graff-Radford, N. Ertekin-Taner, *ABI3* and *PLCG2* missense variants as risk factors for neurodegenerative diseases in Caucasians and African Americans. *Mol. Neurodegener.* **13**, 53 (2018).
36. S. J. van der Lee, O. J. Conway, I. Jansen, M. M. Carrasquillo, L. Kleideidam, E. van den Akker, I. Hernández, K. R. van Eijk, N. Stringa, J. A. Chen, A. Zettergren, T. F. M. Andlauer, M. Diez-Fairen, J. Simon-Sanchez, A. Lleó, H. Zetterberg, M. Nygaard, C. Blauwendraat, J. E. Savage, J. Mengel-From, S. Moreno-Grau, M. Wagner, J. Fortea, M. J. Keogh, K. Blennow, I. Skoog, M. A. Friese, O. Pletnikova, M. Zulaica, C. Lage, I. de Rojas, S. Riedel-Heller, I. Illán-Gala, W. Wei, B. Jeune, A. Orellana, F. Then Bergh, X. Wang, M. Hulsman, N. Beker, N. Tesi, C. M. Morris, B. Indakoetxea,

L. E. Collij, M. Scherer, E. Morenas-Rodríguez, J. W. Ironside, B. N. M. van Berckel, D. Alcolea, H. Wiendl, S. L. Strickland, P. Pastor, E. Rodríguez Rodríguez; DESGESCO (Dementia Genetics Spanish Consortium), EADB (Alzheimer Disease European DNA biobank), EADB (Alzheimer Disease European DNA biobank), IFGC (International FTD-Genomics Consortium), IPDGC (The International Parkinson Disease Genomics Consortium), IPDGC (The International Parkinson Disease Genomics Consortium), RiMod-FTD (Risk and Modifying factors in Fronto-Temporal Dementia), Netherlands Brain Bank (NBB), B. F. Boeve, R. C. Petersen, T. J. Ferman, J. A. van Gerpen, M. J. T. Reinders, R. J. Uitti, L. Tárraga, W. Maier, O. Dols-Icardo, A. Kawalia, M. C. Dalmaso, M. Boada, U. K. Zettl, N. M. van Schoor, M. Beekman, M. Allen, E. Masliah, A. L. de Munain, A. Pantelyat, Z. K. Wszolek, O. A. Ross, D. W. Dickson, N. R. Graff-Radford, D. Knopman, R. Rademakers, A. W. Lemstra, Y. A. L. Pijnenburg, P. Scheltens, T. Gasser, P. F. Chinnery, B. Hemmer, M. A. Huisman, J. Troncoso, F. Moreno, E. A. Nohr, T. I. A. Sørensen, P. Heutink, P. Sánchez-Juan, D. Posthuma; GIFT (Genetic Investigation in Frontotemporal Dementia and Alzheimer's Disease) Study Group, J. Clarimón, K. Christensen, N. Ertekin-Taner, S. W. Scholz, A. Ramirez, A. Ruiz, E. Slagboom, W. M. van der Flier, H. Holstege, A nonsynonymous mutation in *PLCG2* reduces the risk of Alzheimer's disease, dementia with Lewy bodies and frontotemporal dementia, and increases the likelihood of longevity. *Acta Neuropathol.* **138**, 237–250 (2019).

37. M. C. Dalmaso, L. I. Brusco, N. Olivar, C. Muchnik, C. Hanses, E. Milz, J. Becker, S. Heilmann-Heimbach, P. Hoffmann, F. A. Prestia, P. Galeano, M. S. S. Avalos, L. E. Martinez, M. E. Carulla, P. J. Azurmendi, C. Liberczuk, C. Fezza, M. Sampaño, M. Fierens, G. Jemar, P. Solis, N. Medel, J. Liso, Z. Sevillano, P. Bosco, P. Bossù, G. Spalletta, D. Galimberti, M. Mancuso, B. Nacmias, S. Sorbi, P. Mecocci, A. Pilotto, P. Caffarra, F. Panza, M. Bullido, J. Clarimon, P. Sánchez-Juan, E. Coto, F. Sanchez-Garcia, C. Graff, M. Ingelsson, C. Bellenguez, E. M. Castaño, C. Kairiyama, D. G. Politis, S. Kochen, H. Scaro, W. Maier, F. Jessen, C. A. Mangone, J.-C. Lambert, L. Morelli, A. Ramirez, Transethnic meta-analysis of rare coding variants in *PLCG2*, *ABI3*, and *TREM2* supports their general contribution to Alzheimer's disease. *Transl. Psychiatry* **9**, 55 (2019).

38. L. Magno, C. B. Lessard, M. Martins, P. Cruz, M. Katan, J. Bilsland, P. Chakrabaty, T. E. Golde, P. Whiting, Alzheimer's disease phospholipase C-gamma-2 (*PLCG2*) protective variant is a functional hypermorph. *Alzheimers Res. Ther.* **11**, 16 (2019).



39. J. D. Milner, PLAID: A syndrome of complex patterns of disease and unique phenotypes. *J. Clin. Immunol.* **35**, 527–530 (2015).
40. A. Nott, I. R. Holtman, N. G. Coufal, J. C. M. Schlachetzki, M. Yu, R. Hu, C. Z. Han, M. Pena, J. Xiao, Y. Wu, Z. Keulen, M. P. Pasillas, C. O'Connor, C. K. Nickl, S. T. Schafer, Z. Shen, R. A. Rissman, J. B. Brewer, D. Gosselin, D. D. Gonda, M. L. Levy, M. G. Rosenfeld, G. McVicker, F. H. Gage, B. Ren, C. K. Glass, Brain cell type-specific enhancer-promoter interactome maps and disease risk association. *Science* **366**, 1134–1139 (2019).
41. T. E. Golde, Harnessing immunoproteostasis to treat neurodegenerative disorders. *Neuron* **101**, 1003–1015 (2019).
42. I. Litvan, K. P. Bhatia, D. J. Burn, C. G. Goetz, A. E. Lang, I. McKeith, N. Quinn, K. D. Sethi, C. Shults, G. K. Wenning; Movement Disorders Society Scientific Issues Committee, Movement Disorders Society Scientific Issues Committee report: SIC Task Force appraisal of clinical diagnostic criteria for parkinsonian disorders. *Mov. Disord.* **18**, 467–486 (2003).
43. B. A. Cholerton, C. P. Zabetian, J. F. Quinn, K. A. Chung, A. Peterson, A. J. Espay, F. J. Revilla, J. Devoto, G. Watson, S. C. Hu, K. L. Edwards, T. J. Montine, J. B. Leverenz, Pacific Northwest Udall Center of excellence clinical consortium: Study design and baseline cohort characteristics. *J. Parkinsons Dis.* **3**, 205–214 (2013).
44. G. M. McKhann, D. S. Knopman, H. Chertkow, B. T. Hyman, C. R. Jack, C. H. Kawas, W. E. Klunk, W. J. Koroshetz, J. J. Manly, R. Mayeux, R. C. Mohs, J. C. Morris, M. N. Rossor, P. Scheltens, M. C. Carrillo, B. Thies, S. Weintraub, C. H. Phelps, The diagnosis of dementia due to Alzheimer's disease: Recommendations from the National Institute on Aging-Alzheimer's Association workgroups on diagnostic guidelines for Alzheimer's disease. *Alzheimers Dement.* **7**, 263–269 (2011).
45. H. W. Grievink, T. Luisman, C. Kluft, M. Moerland, K. E. Malone, Comparison of three isolation techniques for human peripheral blood mononuclear cells: Cell recovery and viability, population composition, and cell functionality. *Biopreserv. Biobank.* **14**, 410–415 (2016).

46. R. Fernandez, H. Maecker, Cytokine-stimulated phosphoflow of PBMC using CyTOF mass cytometry. *Bio Protoc.* **5**, e1496 (2015).
47. E. R. Zunder, R. Finck, G. K. Behbehani, E.-A. D. Amir, S. Krishnaswamy, V. D. Gonzalez, C. G. Lorang, Z. Bjornson, M. H. Spitzer, B. Bodenmiller, W. J. Fantl, D. Pe'er, G. P. Nolan, Palladium-based mass tag cell barcoding with a doublet-filtering scheme and single-cell deconvolution algorithm. *Nat. Protoc.* **10**, 316–333 (2015).
48. J. Choi, R. Fernandez, H. T. Maecker, M. J. Butte, Systems approach to uncover signaling networks in primary immunodeficiency diseases. *J. Allergy Clin. Immunol.* **140**, 881–884.e8 (2017).
49. S. C. Bendall, E. F. Simonds, P. Qiu, E.-A. D. Amir, P. O. Krutzik, R. Finck, R. V. Bruggner, R. Melamed, A. Trejo, O. I. Ornatsky, R. S. Balderas, S. K. Plevritis, K. Sachs, D. Pe'er, S. D. Tanner, G. P. Nolan, Single-cell mass cytometry of differential immune and drug responses across a human hematopoietic continuum. *Science* **332**, 687–696 (2011).
50. R. Finck, E. F. Simonds, A. Jager, S. Krishnaswamy, K. Sachs, W. Fantl, D. Pe'er, G. P. Nolan, S. C. Bendall, Normalization of mass cytometry data with bead standards. *Cytometry A* **83**, 483–494 (2013).
51. W. E. O'Gorman, H. Huang, Y.-L. Wei, K. L. Davis, M. D. Leipold, S. C. Bendall, B. A. Kidd, C. L. Dekker, H. T. Maecker, Y.-H. Chien, M. M. Davis, The split virus influenza vaccine rapidly activates immune cells through Fcγ receptors. *Vaccine* **32**, 5989–5997 (2014).
52. C. L. Galligan, J. C. Siebert, K. A. Siminovitch, E. C. Keystone, V. Bykerk, O. D. Perez, E. N. Fish, Multiparameter phospho-flow analysis of lymphocytes in early rheumatoid arthritis: Implications for diagnosis and monitoring drug therapy. *PLOS ONE* **4**, e6703 (2009).
53. W. Xu, F. Fang, J. Ding, C. Wu, Dysregulation of Rab5-mediated endocytic pathways in Alzheimer's disease. *Traffic* **19**, 253–262 (2018).
54. R. Xavier, N. Turck, A. Hainard, N. Tiberti, F. Lisacek, J. C. Sanchez, M. Müller, pROC: An open-source package for R and S+ to analyze and compare ROC curves. *BMC Bioinformatics* **12**, 77 (2011).

55. C. James, J. Bithell, Bootstrap confidence intervals: When, which, what? A practical guide for medical statisticians. *Stat. Med.* **19**, 1141–1164 (2000).
56. N. A. Obuchowski, M. L. Lieber, F. H. Wians Jr., ROC curves in *Clinical Chemistry*: Uses, misuses, and possible solutions. *Clin. Chem.* **50**, 1118–1125 (2004).
57. M. D. Leipold, E. W. Newell, H. T. Maecker, *Multiparameter Phenotyping of Human PBMCs using Mass Cytometry in Immunosenescence* (Humana Press, 2015), pp. 81–95.
58. W. E. Johnson, C. Li, A. Rabinovic, Adjusting batch effects in microarray expression data using empirical Bayes methods. *Biostatistics* **8**, 118–127 (2007).
59. A. Scherer, *Batch Effects and Noise in Microarray Experiments: Sources and Solutions* (John Wiley & Sons, 2009).
60. D. Di Mitri, R. I. Azevedo, S. M. Henson, V. Libri, N. E. Riddell, R. Macaulay, D. Kipling, M. V. D. Soares, L. Battistini, A. N. Akbar, Reversible senescence in human CD4<sup>+</sup> CD45RA<sup>+</sup> CD27<sup>-</sup> memory T cells. *J. Immunol.* **187**, 2093–2100 (2011).
61. V. M. R. Muggeo, Estimating regression models with unknown break-points. *Stat. Med.* **22**, 3055–3071 (2003).
